# Supplementary material
Source: MDPI journal article supplement (https://www.mdpi.com/2813-0618/2/4/30)
Supplement: s1 [file s1]

## Supplementary Material 1: Systematic Search and Review Search Terms

Ovid MEDLINE(R) and Epub Ahead of Print, In-Process, In-Data-Review & Other Non-Indexed Citations and Daily 1946 to June 30, 2023:

1. exp prescription drug monitoring programs/
2. (((prescription or controlled substance\*) adj2 (automat\* or electronic or evaluation\* or internet or monitoring or online or review\* or tracking)).ti,ab,kw) and  
(((prescription or controlled substance\*) adj5 (collection or database\* or program\* or registry or registries or report\* or system\*)).ti,ab,kw)
3. (prescription drug registry or controlled substance database or internet system for tracking over-prescribing or prescription controlled substance abuse prevention or prescription review).ti,ab,kw
4. 1 or 2 or 3 or 4
5. exp physicians/ or exp nurses/ or exp pharmacists/ or exp physician assistants/ or exp dentists/ or ((pharmacist\* or doctor\* or physician\* or physician\* assistant\* or dentist\* or PA or PA-C or nurse practitioner\* or NP or CNP or APRN or clinician\*).ti,ab,kw)
6. 4 and 5
7. limit 6 to yr="2016 -2023"
8. limit 7 to english language

### EMBASE

1. 'prescription drug monitoring program'/exp
2. (((prescription OR 'controlled substance\*') NEAR/2 (automat\* OR electronic OR evaluation\* OR internet OR monitoring OR online OR review\* OR tracking)).ti,ab,kw) AND  
(((prescription OR 'controlled substance\*') NEAR/5 (collection or database\* OR program\* OR registry OR registries OR report\* OR system\*)).ti,ab,kw)
3. ('prescription drug registry' OR 'controlled substance database' OR 'internet system for tracking over-prescribing' OR 'prescription controlled substance abuse prevention' OR 'prescription review').ti,ab,kw
4. #1 OR #2 OR #3
5. physician/exp OR nurse/exp OR pharmacist/exp OR 'advanced practice provider'/exp OR dentist/exp OR ((pharmacist\* OR doctor\* OR physician\* OR 'physician\* assistant\*' OR dentist\* OR 'PA' OR 'PA-C' OR 'nurse practitioner\*' or 'NP' or 'CNP' or 'APRN' or clinician\*).ti,ab,kw)
6. #4 AND #5
7. #6 AND (2016:py OR 2017:py OR 2018:py OR 2019:py OR 2020:py OR 2021:py OR 2022:py OR 2023:py) AND [english]/lim

### CINAHL Plus with Full Text

1. MH"prescription drug monitoring programs"

2. TI((prescription OR "controlled substance\*") N2 (automat\* OR electronic OR evaluation\* OR internet OR monitoring OR online OR review\* OR tracking))
3. AB((prescription OR "controlled substance\*") N2 (automat\* OR electronic OR evaluation\* OR internet OR monitoring OR online OR review\* OR tracking))
4. SU((prescription OR "controlled substance\*") N2 (automat\* OR electronic OR evaluation\* OR internet OR monitoring OR online OR review\* OR tracking))
5. S2 OR S3 OR S4
6. TI((prescription OR "controlled substance\*") "N5 (collection or database\* OR program\* OR registry OR registries OR report\* OR system\*))
7. AB((prescription OR "controlled substance\*") "N5 (collection or database\* OR program\* OR registry OR registries OR report\* OR system\*))
8. SU((prescription OR "controlled substance\*") "N5 (collection or database\* OR program\* OR registry OR registries OR report\* OR system\*))
9. S6 OR S7 OR S8
10. S5 AND S9
11. SU("prescription drug registry" OR "controlled substance database" OR "internet system for tracking over-prescribing" OR "prescription controlled substance abuse prevention" OR "prescription review")
12. S1 OR S10 OR S11
13. MH(physicians+ OR nurses+ OR pharmacists+ OR dentists+ OR "advanced practice nurses+")
14. TI(pharmacist\* OR doctor\* OR physician\* OR "physician\* assistant"\* OR dentist\* OR "PA" OR "PA-C" OR "nurse practitioner\*" OR "NP" OR "CNP" OR "APRN" OR clinician\*)
15. AB(pharmacist\* OR doctor\* OR physician\* OR "physician\* assistant"\* OR dentist\* OR "PA" OR "PA-C" OR "nurse practitioner\*" OR "NP" OR "CNP" OR "APRN" OR clinician\*)
16. SU(pharmacist\* OR doctor\* OR physician\* OR "physician\* assistant"\* OR dentist\* OR "PA" OR "PA-C" OR "nurse practitioner\*" OR "NP" OR "CNP" OR "APRN" OR clinician\*)
17. S13 OR S14 OR S15 OR S16
18. S12 AND S17
19. S18 with Limiters - Published Date: 20600101-20230630
20. S19 English only articles

#### Cochrane Library

1. MeSH descriptor: [Prescription Drug Monitoring Programs] explode all trees
2. ((prescription OR 'controlled substance\*') NEAR/2 (automat\* OR electronic OR evaluation\* OR internet OR monitoring OR online OR review\* OR tracking)):ti,ab,kw
3. ((prescription OR 'controlled substance\*') NEAR/5 (collection or database\* OR program\* OR registry OR registries OR report\* OR system\*)):ti,ab,kw
4. #2 AND #3
5. ('prescription drug registry' OR 'controlled substance database' OR 'internet system for tracking over-prescribing' OR 'prescription controlled substance abuse prevention' OR 'prescription review'):ti,ab,kw

6. #1 OR #4 OR #5
7. (pharmacist\* OR doctor\* OR physician\* OR 'physician\* assistant\*' OR dentist\* OR 'PA' OR 'PA-C' OR 'nurse practitioner\*' or 'NP' or 'CNP' or 'APRN' or clinician\*):ti,ab,kw
8. MeSH descriptor: [physician] explode all trees
9. MeSH descriptor: [nurses] explode all trees
10. MeSH descriptor: [pharmacists] explode all trees
11. MeSH descriptor: [advanced practice nursing] explode all trees
12. MeSH descriptor: physician assistants] explode all trees
13. MeSH descriptor: [dentist] explode all trees
14. #7 OR #8 OR #9 OR #10 OR #11 OR #12 OR #13
15. #6 AND #14
16. with Cochrane Library publication date from Jan 2016 to Jun 2023
