# Supplementary material
Source: MDPI journal article supplement (https://www.mdpi.com/2813-0618/2/4/30)
Supplement: s1 [file s1]

**TABLE S1: Summary of Study Results**

| Intervention Category                                                            | Amount of opioids overall                                                                                                                                                                                                                                                                                                                                                                                                                                                                                                                                                                                                                                                                                           |                                                                                                                                                                                              | Amount of risky prescriptions                                                                                                                       |                                                  | Other Outcomes                                                                                                                                                                                                                                                                                                                                                                                                                                                                                                                                                                                                                                                                                                    |
|----------------------------------------------------------------------------------|---------------------------------------------------------------------------------------------------------------------------------------------------------------------------------------------------------------------------------------------------------------------------------------------------------------------------------------------------------------------------------------------------------------------------------------------------------------------------------------------------------------------------------------------------------------------------------------------------------------------------------------------------------------------------------------------------------------------|----------------------------------------------------------------------------------------------------------------------------------------------------------------------------------------------|-----------------------------------------------------------------------------------------------------------------------------------------------------|--------------------------------------------------|-------------------------------------------------------------------------------------------------------------------------------------------------------------------------------------------------------------------------------------------------------------------------------------------------------------------------------------------------------------------------------------------------------------------------------------------------------------------------------------------------------------------------------------------------------------------------------------------------------------------------------------------------------------------------------------------------------------------|
|                                                                                  | Decrease                                                                                                                                                                                                                                                                                                                                                                                                                                                                                                                                                                                                                                                                                                            | No Change                                                                                                                                                                                    | Decrease                                                                                                                                            | No Change                                        |                                                                                                                                                                                                                                                                                                                                                                                                                                                                                                                                                                                                                                                                                                                   |
| PDMP implementation and mandated registration (Less comprehensive PDMP mandates) | Bao et al., 2016<br>Gupta, et al., 2021<br>Henry, et al., 2021<br>Le, et al., 2022<br>Sahebi- Fakhrrabad, et al., 2023<br>Wen et al., 2017<br>Yarbrough, 2018                                                                                                                                                                                                                                                                                                                                                                                                                                                                                                                                                       | Arnold, et al., 2021<br>Ayres & Jalal, 2018<br>Buchmueller & Carey, 2018<br>Maierhofer, et al., 2021<br>McGinty, et al., 2022<br>Meinhofer, 2018<br>Moyo et al., 2017<br>Ozturk et al., 2021 | Deyo et al., 2018<br>Henry, et al., 2021                                                                                                            | Meara, et al., 2016<br>Buchmueller & Carey, 2018 | Amount of non-opioid analgesics<br><ul style="list-style-type: none"> <li>No change in amount (McGinty, et al., 2022)</li> </ul><br>Amount of stimulants<br><ul style="list-style-type: none"> <li>No change in amount (Meinhofer, 2018)</li> </ul>                                                                                                                                                                                                                                                                                                                                                                                                                                                               |
| Mandated PDMP use and stronger PDMP laws (More comprehensive PDMP mandates)      | Al Achkar et al., 2018<br>Aulet et al., 2019<br>Ayres & Jalal, 2018<br>Bachhuber et al., 2019<br>Buchmueller & Carey, 2018<br>Buchmueller, et al., 2020<br>Chang et al., 2016<br>Chang et al., 2018<br>Danagoulain, et al., 2021<br>Derleth et al., 2020<br>Dowell et al., 2016<br>Graetz, et al., 2023<br>Haffajee et al., 2018<br>Le, et al., 2022<br>Maierhofer, et al., 2021<br>Manders & Abd-Elsayed, 2020<br>Meinhofer, 2018<br>Myrga et al., 2020<br>Rubin, et al., 2022<br>Sacks et al., 2021<br>Strickler et al., 2019<br>Suffoletto et al., 2018<br>Toce, et al., 2023a<br>Wang, et al., 2021<br>Watson et al., 2021<br>Wen et al., 2019<br>Yarbrough, 2018<br>Zeiner, et al., 2021<br>Zhang et al., 2021 | Khobrani et al., 2019<br>Lin et al., 2018<br>McGinty, et al., 2022                                                                                                                           | Bachhuber et al., 2019<br>Bao et al., 2018<br>Buchmueller & Carey, 2018<br>Nguyen, et al., 2023<br>Strickler et al., 2019<br>Townsend, et al., 2022 |                                                  | Amount of stimulants<br><ul style="list-style-type: none"> <li>Increase (Manders &amp; Abd-Elsayed, 2020)</li> <li>Decrease (Meinhofer, 2018)</li> </ul><br>Amount of benzodiazepines<br><ul style="list-style-type: none"> <li>Increase (Danagoulain, et al., 2021);</li> <li>No change (Liang et al., 2021)</li> <li>Decrease (Manders &amp; Abd-Elsayed, 2020; Toce, et al., 2023b)</li> </ul><br>Amount of non-opioid analgesics<br><ul style="list-style-type: none"> <li>Increase (Khobrani et al., 2019)</li> <li>No change (Lin et al., 2018; McGinty, et al., 2022)</li> </ul><br>Length of chronic opioid therapy<br><ul style="list-style-type: none"> <li>No change (Arnold, et al., 2021)</li> </ul> |

| Intervention Category                         | Amount of opioids overall                                                                                                              |                  | Amount of risky prescriptions                                                                                                          |                       | Other Outcomes                                                                                                    |
|-----------------------------------------------|----------------------------------------------------------------------------------------------------------------------------------------|------------------|----------------------------------------------------------------------------------------------------------------------------------------|-----------------------|-------------------------------------------------------------------------------------------------------------------|
|                                               | Decrease                                                                                                                               | No Change        | Decrease                                                                                                                               | No Change             |                                                                                                                   |
| Proactive notification of risky prescriptions | Castillo- Carniglia et al., 2021<br>McDonald, et al., 2019<br>Underwood, et al., 2023<br>Winstanley et al., 2018<br>Young et al., 2018 | Sun et al., 2018 | Castillo- Carniglia et al., 2021<br>McDonald, et al., 2019<br>Underwood, et al., 2021<br>Winstanley et al., 2018<br>Young et al., 2018 | Sacarny, et al., 2023 | Amount of benzodiazepines<br><ul style="list-style-type: none"> <li>Decrease (Winstanley et al., 2018)</li> </ul> |
| Data sharing across states                    |                                                                                                                                        | Lin et al., 2019 |                                                                                                                                        |                       | Amount of non-opioid analgesics<br><ul style="list-style-type: none"> <li>No change (Lin et al., 2019)</li> </ul> |
| Delegate access to PDMP                       |                                                                                                                                        |                  | Bao et al., 2018                                                                                                                       |                       |                                                                                                                   |
