# Supplementary material
Source: MDPI journal article supplement (https://www.mdpi.com/2813-0618/2/4/30)
Supplement: s1 [file s1]

## Appendix S2: Systematic Search and Review Abstraction

Records included in the review:

1. Al Achkar, M., Grannis, S., Revere, D., MacKie, P., Howard, M., & Gupta, S. (2018). The effects of state rules on opioid prescribing in Indiana. *BMC Health Services Research*, 18(1), 29.
2. Arnold J., Zhao X., Cashy J.P., Sileanu F.E., Mor M.K., Moyo P., Thorpe C.T., Good C.B., Radomski T.R., Fine M.J., & Gellad W.F. (2021). An Interrupted Time-series Evaluation of the Association Between State Laws Mandating Prescriber Use of Prescription Drug Monitoring Programs and Discontinuation of Chronic Opioid Therapy in US Veterans. *Medical Care*, 59(12), 1042–1050.
3. Aulet, R. M., Trieu, V., Landrigan, G. P., & Millay, D. J. (2019). Changes in Opioid Prescribing Habits for Patients Undergoing Rhinoplasty and Septoplasty. *JAMA Facial Plastic Surgery*, 21(6), 487–490.
4. Ayres, I., & Jalal, A. (2018). The Impact of Prescription Drug Monitoring Programs on U.S. Opioid Prescriptions. *The Journal of Law, Medicine & Ethics: A Journal of the American Society of Law, Medicine & Ethics*, 46(2), 387–403.
5. Bachhuber, M. A., Tuazon, E., Nolan, M. L., Kunins, H. V., & Paone, D. (2019). Impact of a prescription drug monitoring program use mandate on potentially problematic patterns of opioid analgesic prescriptions in New York City. *Pharmacoepidemiology and Drug Safety*, 28(5), 734–739.
6. Bao, Y., Pan, Y., Taylor, A., Radakrishnan, S., Luo, F., Pincus, H. A., & Schackman, B. R. (2016). Prescription Drug Monitoring Programs Are Associated With Sustained Reductions In Opioid Prescribing By Physicians. *Health Affairs*, 35(6), 1045–1051.
7. Bao, Y., Wen, K., Johnson, P., Jeng, P. J., Meisel, Z. F., & Schackman, B. R. (2018). Assessing The Impact Of State Policies For Prescription Drug Monitoring Programs On High-Risk Opioid Prescriptions. *Health Affairs*, 37(10), 1596–1604.
8. Buchmueller, T. C., & Carey, C. (2018). The Effect of Prescription Drug Monitoring Programs on Opioid Utilization in Medicare. *American Economic Journal: Economic Policy*, 10(1), 77–112.
9. Buchmueller, T. C., Carey, C. M., & Meille, G. (2020). How well do doctors know their patients? Evidence from a mandatory access prescription drug monitoring program. *Health Economics*, 29(9), 957–974.
10. Castillo-Carniglia, A., González-Santa Cruz, A., Cerdá, M., Delcher, C., Shev, A. B., Wintemute, G. J., & Henry, S. G. (2021). Changes in opioid prescribing after implementation of mandatory registration and proactive reports within California's prescription drug monitoring program. *Drug & Alcohol Dependence*, 218, N.PAG – N.PAG.
11. Chang, H.-Y., Lyapustina, T., Rutkow, L., Daubresse, M., Richey, M., Faul, M., Stuart, E. A., & Alexander, G. C. (2016). Impact of prescription drug monitoring programs and pill mill laws on high-risk opioid prescribers: A comparative interrupted time series analysis. *Drug and Alcohol Dependence*, 165, 1–8.
12. Chang, H.-Y., Murimi, I., Faul, M., Rutkow, L., & Alexander, G. C. (2018). Impact of Florida's prescription drug monitoring program and pill mill law on high-risk patients: A comparative interrupted time series analysis. *Pharmacoepidemiology and Drug Safety*,

27(4), 422–429.

13. Danagouliau, S., King, A., Mangan, K., Tarchick, J., & B., D. (2021). Fewer Opioids but More Benzodiazepines? Prescription Trends by Specialty in Response to the Implementation of Michigan's Opioid Laws. *Pain Medicine*, 23(2), 403–413.
14. Derleth, B. M., Dexter, D. D., Arndt, R., Lea, C. M., Dierkhising, R. A., & Dow, J. F. (2020). Effect of a Statewide Controlled-Substance Monitoring Requirement on the Opioid Prescribing Practice for Treatment of Acute Pain. *WMJ: Official Publication of the State Medical Society of Wisconsin*, 119(1), 33–36.
15. Deyo, R. A., Hallvik, S. E., Hildebran, C., Marino, M., Springer, R., Irvine, J. M., O'Kane, N., Van Otterloo, J., Wright, D. A., Leichtling, G., Millet, L. M., Carson, J., Wakeland, W., McCarty, D., & O'Kane, N. (2018). Association of Prescription Drug Monitoring Program Use With Opioid Prescribing and Health Outcomes: A Comparison of Program Users and Nonusers. *Journal of Pain*, 19(2), 166–177.
16. Dowell, D., Zhang, K., Noonan, R. K., & Hockenberry, J. M. (2016). Mandatory Provider Review And Pain Clinic Laws Reduce The Amounts Of Opioids Prescribed And Overdose Death Rates. *Health Affairs*, 35(10), 1876–1883.
17. Graetz, I., Hu, X., Ji, X., Wetzel, M., & Yarbrough, C. R. (2023). The effect of cancer exemption in mandatory-access prescription drug monitoring programs among oncologists. *JNCI Cancer Spectrum*, 7(2). <https://doi.org/10.1093/jncics/pkad006>
18. Gupta R., Boehmer S., Giampetro D., Gupta A., & DeFlitch C.J. (2021). Effect of a prescription drug monitoring program on emergency department opioid prescribing. *The Western Journal of Emergency Medicine*, 22(3), 756–762.
19. Haffajee, R. L., Mello, M. M., Zhang, F., Zaslavsky, A. M., Larochelle, M. R., & Wharam, J. F. (2018). Four States With Robust Prescription Drug Monitoring Programs Reduced Opioid Dosages. *Health Affairs*, 37(6), 964–974.
20. Henry S.G., Shev A.B., Crow D., Stewart S.L., Wintemute G.J., Fenlon C., & Wirtz S.J. (2021). Impacts of prescription drug monitoring program policy changes and county opioid safety coalitions on prescribing and overdose outcomes in California, 2015-2018. *Preventive Medicine*, 153, 106861.
21. Khobrani, M., Perona, S., & Patanwala, A. E. (2019). Effect of a legislative mandate on opioid prescribing for back pain in the emergency department. *The American Journal of Emergency Medicine*, 37(11), 2035–2038.
22. Le T.T., Fleming S.P., Kuzucan A., Dizik A., & Simoni-Wastila L. (2022). Query mandates in prescription drug monitoring programs reduce opioid use among commercially insured patients with cancer. *Journal of the American Pharmacists Association: JAPhA*, 62(1), 363–369.
23. Liang D., Guo H., & Shi Y. (2021). Mandatory use of prescription drug monitoring program and benzodiazepine prescribing among U.S. Medicaid enrollees. *Substance Abuse: Official Publication of the Association for Medical Education and Research in Substance Abuse*, 42(3), 294–301.
24. Lin, H.-C., Wang, Z., Boyd, C., Simoni-Wastila, L., & Buu, A. (2018). Associations between statewide prescription drug monitoring program (PDMP) requirement and physician patterns of prescribing opioid analgesics for patients with non-cancer chronic pain. *Addictive Behaviors*, 76, 348–354.
25. Lin, H.-C., Wang, Z., Simoni-Wastila, L., Boyd, C., & Buu, A. (2019). Interstate data sharing of prescription drug monitoring programs and associated opioid prescriptions

- among patients with non-cancer chronic pain. *Preventive Medicine*, 118, 59–65.
26. Maierhofer, C. N., Ranapurwala, S. I., DiPrete, B. L., Fulcher, N., Ringwalt, C. L., Chelminski, P. R., Ives, T. J., Dasgupta, N., Go, V. F., & Pence, B. W. (2021). Association Between Statewide Opioid Prescribing Interventions and Opioid Prescribing Patterns in North Carolina, 2006–2018. *Pain Medicine*, 22(12), 2931–2940.
  27. Manders, L., & Abd-Elseyed, A. (2020). Mandatory Review of Prescription Drug Monitoring Program Before Issuance of a Controlled Substance Results in Overall Reduction of Prescriptions Including Opioids and Benzodiazepines. *Pain Physician*, 23(3), 299–304.
  28. McDonald, D. C., Carlson, K. E., & Jalbert, S. K. (2019). An Experimental Test of the Effectiveness of Unsolicited Reporting by a Prescription Drug Monitoring Program in Reducing Inappropriate Acquisition of Opioids. *Pain Medicine*, 20(5), 944–954.
  29. McGinty E.E., Bicket M.C., Seewald N.J., Stuart E.A., Alexander G.C., Barry C.L., McCourt A.D., & Rutkow L. (2022). Effects of State Opioid Prescribing Laws on Use of Opioid and Other Pain Treatments Among Commercially Insured U.S. Adults. *Annals of Internal Medicine*, 175(5), 617–627.
  30. Meara, E., Horwitz, J. R., Powell, W., McClelland, L., Zhou, W., O'Malley, A. J., & Morden, N. E. (2016). State Legal Restrictions and Prescription-Opioid Use among Disabled Adults. *The New England Journal of Medicine*, 375(1), 44–53.
  31. Meinhofer, A. (2018). Prescription drug monitoring programs: The role of asymmetric information on drug availability and abuse. *American Journal of Health Economics*, 4(4), 504–526.
  32. Moyo, P., Simoni-Wastila, L., Griffin, B. A., Onukwugha, E., Harrington, D., Alexander, G. C., & Palumbo, F. (2017). Impact of prescription drug monitoring programs (PDMPs) on opioid utilization among Medicare beneficiaries in 10 US States. *Addiction*, 112(10), 1784–1796.
  33. Myrnga, J. M., Macleod, L. C., Bandari, J., Jacobs, B. L., & Davies, B. J. (2020). Decrease in Urologic Discharge Opioid Prescribing after Mandatory Query of Statewide Prescription Drug Monitoring Program. *Urology*, 139, 84–89.
  34. Nguyen, T., Meillec, G., & Buchmueller, T. (2023). Mandatory prescription drug monitoring programs and overlapping prescriptions of opioids and benzodiazepines: Evidence from Kentucky. *Drug and Alcohol Dependence*, 243, 109759.
  35. Ozturk, O., Hong, Y., McDermott, S., & Turk, M. (2021). Prescription Drug Monitoring Programs and Opioid Prescriptions for Disability Conditions. *Applied Health Economics and Health Policy*, 19(3), 415–428.
  36. Rubin S.J., Wang J.J., Nodoushani A.Y., Yarlagadda B.B., Wulu J.A., & Edwards H.A. (2022). The effect of a statewide prescription drug monitoring program on opioid prescribing patterns. *American Journal of Otolaryngology - Head and Neck Medicine and Surgery*, 43(1), 103262.
  37. Sacarny, A., Avilova, T., Powell, D., Williamson, I., Merrick, W., & Jacobson, M. (2023). A Randomized Trial Of Letters To Encourage Prescription Monitoring Program Use And Safe Opioid Prescribing. *Health Affairs*, 42(1), 140–149.
  38. Sacks, D. W., Hollingsworth, A., Nguyen, T., & Simon, K. (2021). Can policy affect initiation of addictive substance use? Evidence from opioid prescribing. *Journal of Health Economics*, 76, N.PAG – N.PAG.
  39. Sahebi-Fakhrabad, A., Sadeghi, A. H., & R., H. (2023). Evaluating State-Level

Prescription Drug Monitoring Program (PDMP) and Pill Mill Effects on Opioid Consumption in Pharmaceutical Supply Chain. *Healthcare (MDPI)*, 11(437).  
<https://doi.org/10.3390/healthcare11030437>

40. Strickler, G. K., Zhang, K., Halpin, J. F., Bohnert, A. S. B., Baldwin, G. T., & Kreiner, P. W. (2019). Effects of mandatory prescription drug monitoring program (PDMP) use laws on prescriber registration and use and on risky prescribing. *Drug and Alcohol Dependence*, 199, 1–9.
41. Suffoletto, B., Lynch, M., Pacella, C. B., Yealy, D. M., & Callaway, C. W. (2017). The Effect of a Statewide Mandatory Prescription Drug Monitoring Program on Opioid Prescribing by Emergency Medicine Providers Across 15 Hospitals in a Single Health System. *The Journal of Pain: Official Journal of the American Pain Society*, 19(4), 430–438.
42. Sun, B. C., Charlesworth, C. J., Lupulescu-Mann, N., Young, J. I., Kim, H., Hartung, D. M., Deyo, R. A., & McConnell, K. J. (2018). Effect of Automated Prescription Drug Monitoring Program Queries on Emergency Department Opioid Prescribing. *Annals of Emergency Medicine*, 71(3), 337–347.e6.
43. Toce, M. S., Michelson, K. A., Hudgins, J. D., Hadland, S. E., Olson, K. L., Monuteaux, M. C., & Bourgeois, F. T. (2023). Association of Prescription Drug Monitoring Programs With Opioid Prescribing and Overdose in Adolescents and Young Adults. *Annals of Emergency Medicine*, 81(4), 429–437.
44. Toce, M. S., Michelson, K. A., Hudgins, J. D., Olson, K. L., Monuteaux, M. C., & Bourgeois, F. T. (2023). Association of prescription drug monitoring programs with benzodiazepine prescription dispensation and overdose in adolescents and young adults. *Clinical Toxicology*, 61(4), 234–240.
45. Townsend, T. N., Bohnert, A. S. B., Lagisetty, P., & Haffajee, R. L. (2022). Did prescribing laws disproportionately affect opioid dispensing to Black patients? *Health Services Research*, 57(3), 482–496.
46. Underwood, N., Cremer, L., Cance, J. D., Williams, J., Guy, G. P., Jr, & W., Z. (2021). The impact of community-level prevention strategies on high-dose opioid dispensing rates: 2014-2019. *Drug and Alcohol Dependence*, 227(108988).  
<https://doi.org/10.1016/j.drugalcdep.2021.108988>
47. Underwood, N. L., Kane, H., Cance, J., Emery, K., Elek, E., Zule, W., Rooks-Peck, C., Sargent, W., & Mells, J. (2023). Achieving Reductions in Opioid Dispensing: A Qualitative Comparative Analysis of State-Level Efforts to Improve Prescribing. *Journal of Public Health Management and Practice: JPHMP*, 29(2), 262–270.
48. Wang, T. T., Tong, J., Hersh, E. V., Chuang, S.-K., & Panchal, N. (2021). Does prescription drug monitoring program usage affect opioid analgesic prescriptions by oral and maxillofacial surgeons after third molar surgery? *Oral Surgery, Oral Medicine, Oral Pathology and Oral Radiology*, 132(1), 26–31.
49. Watson, C. J., Ganetsky, M., Burke, R. C., Dizitzer, Y., Leventhal, E. L., & Boyle, K. L. (2021). Impact of a Mandatory Prescription Drug Monitoring Program Check on Emergency Department Opioid Prescribing Rates. *Journal of Medical Toxicology: Official Journal of the American College of Medical Toxicology*, 17(3), 265–270.
50. Wen, H., Hockenberry, J. M., Jeng, P. J., & Bao, Y. (2019). Prescription Drug Monitoring Program Mandates: Impact On Opioid Prescribing And Related Hospital Use. *Health Affairs*, 38(9), 1550–1556.

51. Wen, H., Schackman, B. R., Aden, B., & Bao, Y. (2017). States With Prescription Drug Monitoring Mandates Saw A Reduction In Opioids Prescribed To Medicaid Enrollees. *Health Affairs* , 36(4), 733–741.
52. Winstanley, E. L., Zhang, Y., Mashni, R., Schnee, S., Penm, J., Boone, J., McNamee, C., & MacKinnon, N. J. (2018). Mandatory review of a prescription drug monitoring program and impact on opioid and benzodiazepine dispensing. *Drug and Alcohol Dependence*, 188, 169–174.
53. Yarbrough, C. R. (2018). Prescription Drug Monitoring Programs Produce a Limited Impact on Painkiller Prescribing in Medicare Part D. *Health Services Research*, 53(2), 671–689.
54. Young, L. D., Kreiner, P. W., & Panas, L. (2018). Unsolicited Reporting to Prescribers of Opioid Analgesics by a State Prescription Drug Monitoring Program: An Observational Study with Matched Comparison Group. *Pain Medicine* , 19(7), 1396–1407.
55. Zeiner, A. L., Burak, M. A., O’Sullivan, D. M., & Laskey, D. (2021). Effect of a Law Requiring Prescription Drug Monitoring Program Use on Emergency Department Opioid Prescribing: A Single-Center Analysis. *Journal of Pharmacy Practice*, 34(5), 774–779.
56. Zhang, H., Kilaru, A. S., Meisel, Z. F., & Bao, Y. (2021). Prescription Drug Monitoring Program Mandates and Opioids Dispensed Following Emergency Department Encounters for Patients With Sickle Cell Disease or Cancer With Bone Metastasis. *JAMA: The Journal of the American Medical Association*, 326(3), 274–276.

|   | Reference              | Research Design                                                     | Population, size, & setting                                                                                           | Intervention                                                                               | Outcome or Phenomenon Studied                                                                                                                                                                       | Study Data                               | Findings                                                                                       | Limitations                                                                                                                                                                                                                                             |
|---|------------------------|---------------------------------------------------------------------|-----------------------------------------------------------------------------------------------------------------------|--------------------------------------------------------------------------------------------|-----------------------------------------------------------------------------------------------------------------------------------------------------------------------------------------------------|------------------------------------------|------------------------------------------------------------------------------------------------|---------------------------------------------------------------------------------------------------------------------------------------------------------------------------------------------------------------------------------------------------------|
| 1 | Al Achkar et al., 2018 | Level II (Quasi-experimental) Observational (analytic) cohort study | State of Indiana                                                                                                      | Indiana state legislation mandating PDMP use Implemented December 2013                     | Amount of opioids (MEDs) dispensed per day                                                                                                                                                          | 2011 - 2014 Indiana PDMP                 | Mandated PDMP use associated with decrease in opioids dispensed after legislation implemented  | Lacked comparison state                                                                                                                                                                                                                                 |
| 2 | Arnold, et al., 2021   | Level II (Quasi-experimental) Observational (analytic) cohort study | Veterans Health Administration (US national)                                                                          | PDMP mandates from before Aug 2013 in Ohio, Kentucky, West Virginia, Tennessee, New Mexico | <ul style="list-style-type: none"> <li>• Rate of prescription opioid discontinuation among Veterans receiving chronic opioid therapy through the VA</li> <li>• Average daily opioid dose</li> </ul> | 2009 - 2015 Veterans Administration data | PDMP mandates not consistently associated with decrease in the quantity of opioids prescribed  | <ul style="list-style-type: none"> <li>• Study in unique VA healthcare setting with separate national policy re: PDMP use may not be generalizable to other settings</li> <li>• Sole use of VA data may miss care received outside of the VA</li> </ul> |
| 3 | Aulet et al., 2019     | Level II (Quasi-experimental) Observational (analytic) cohort study | University of Vermont Medical Center Burlington, VT Patients that underwent rhinoplasty and/or septoplasty procedures | Vermont state legislation mandating PDMP use Implemented July 2017                         | Amount of opioids (# pills & MMEs) prescribed to patients after surgery                                                                                                                             | 2016 - 2018 Facility EHR                 | Mandated PDMP use associated with decrease in opioids prescribed after legislation implemented | May not be generalizable to other settings: one facility, small sample                                                                                                                                                                                  |

|   | Reference              | Research Design                                                     | Population, size, & setting                                                                                          | Intervention                                                               | Outcome or Phenomenon Studied                                                                                                                                                                                                       | Study Data                                                                            | Findings                                                                                                                                                                                                                                                                           | Limitations                                                                                                                                                                 |
|---|------------------------|---------------------------------------------------------------------|----------------------------------------------------------------------------------------------------------------------|----------------------------------------------------------------------------|-------------------------------------------------------------------------------------------------------------------------------------------------------------------------------------------------------------------------------------|---------------------------------------------------------------------------------------|------------------------------------------------------------------------------------------------------------------------------------------------------------------------------------------------------------------------------------------------------------------------------------|-----------------------------------------------------------------------------------------------------------------------------------------------------------------------------|
| 4 | Ayres & Jalal, 2018    | Level II (Quasi-experimental) Observational (analytic) cohort study | US National                                                                                                          | PDMP legislation across all US states                                      | Amount of opioids (MEDs) dispensed per day per 100 people                                                                                                                                                                           | 2006 - 2015 CDC (QuintilesIMS) sample of prescriptions dispensed by retail pharmacies | <ul style="list-style-type: none"> <li>• PDMPs not effective in reducing opioid dispensing rates unless physicians are required to access the PDMP</li> <li>• Study results driven entirely by urban counties. More affluent counties were more responsive to policies.</li> </ul> | <ul style="list-style-type: none"> <li>• Analysis was on prescription rates per 100 people</li> <li>• Did not have data on the amount, length, or type of opioid</li> </ul> |
| 5 | Bachhuber et al., 2019 | Level II (Quasi-experimental) Observational (analytic) cohort study | New York City, NY                                                                                                    | New York state legislation mandating PDMP use Implemented August 2013      | Rate of risky opioid prescribing per quarter: <ul style="list-style-type: none"> <li>• 5+ prescriber episodes</li> <li>• 5+ prescriber episodes &amp; 5+ pharmacy episodes, or</li> <li>• Cash payment for prescriptions</li> </ul> | 2011 - 2015 New York PDMP                                                             | While instances were rare, mandated PDMP use associated with decrease in rates of potentially problematic opioid prescribing                                                                                                                                                       | May not be generalizable to other states                                                                                                                                    |
| 6 | Bao et al., 2016       | Level II (Quasi-experimental) Observational (analytic) cohort study | 24 states with PDMPs: AL, AZ, CA, CO, CT, IL, IN, IA, LA, ME, MI, MN, MS, NE, NM, NC, ND, OH, OK, SC, TN, VT, VA, WV | PDMPs becoming available to healthcare providers online in 24 study states | Rate of prescribing of at least one Schedule II opioid analgesic in pain-related ambulatory care visits                                                                                                                             | 2001 - 2010 National Ambulatory Medical Care Survey (NAMCS)                           | PDMP implementation associated with sustained reduction in rate of Schedule II opioid prescribing.                                                                                                                                                                                 | Limitations from using a source of data that is a sample of ambulatory care visits                                                                                          |

|   | Reference                 | Research Design                                                     | Population, size, & setting                         | Intervention                                                                            | Outcome or Phenomenon Studied                                                                                                                                                                                                                                                                        | Study Data                                                                                         | Findings                                                                                                                                                                                                                                     | Limitations                                                                                                                                                                                                            |
|---|---------------------------|---------------------------------------------------------------------|-----------------------------------------------------|-----------------------------------------------------------------------------------------|------------------------------------------------------------------------------------------------------------------------------------------------------------------------------------------------------------------------------------------------------------------------------------------------------|----------------------------------------------------------------------------------------------------|----------------------------------------------------------------------------------------------------------------------------------------------------------------------------------------------------------------------------------------------|------------------------------------------------------------------------------------------------------------------------------------------------------------------------------------------------------------------------|
| 7 | Bao et al., 2018          | Level II (Quasi-experimental) Observational (analytic) cohort study | 48 US states with PDMPs (all states except MO & PA) | PDMP legislation regarding mandated PDMP use & the use of delegates to access PDMP data | Amount of risky opioid prescribing: <ul style="list-style-type: none"> <li>• 7+ days overlapping opioid prescriptions</li> <li>• 3+ opioid prescriptions from 3+ prescribers</li> <li>• 7+ days of overlapping opioid and benzodiazepine prescriptions, or</li> <li>• 120+ MME daily dose</li> </ul> | 2011 - 2015 Health Care Cost Institute's private insurance claim database                          | <ul style="list-style-type: none"> <li>• Mandated PDMP use associated with reduction in risky opioid prescribing</li> <li>• Use of delegates for PDMP retrieval associated with reduction in risky opioid prescribing</li> </ul>             | Possible confounding effect of state laws regarding opioid use disorder (OUD) prevention that do not pertain to PDMP                                                                                                   |
| 8 | Buchmueller & Carey, 2018 | Level II (Quasi-experimental) Observational (analytic) cohort study | US National Medicare                                | PDMP legislation across US                                                              | Amount of risky opioid prescriptions: <ul style="list-style-type: none"> <li>• 120+ MED daily dose</li> <li>• Overlapping opioid prescriptions</li> <li>• 5+ prescribers</li> <li>• 5+ pharmacies, or</li> <li>• 4+ new patient visits</li> </ul>                                                    | 2007 - 2013 5% random subsample of Part D & Fee-for-Service Medicare prescription & medical claims | <ul style="list-style-type: none"> <li>• PDMPs not effective in reducing risky prescribing if use not mandated</li> <li>• Mandated PDMP use associated with decreases in excessive opioid quantity &amp; doctor shopping behavior</li> </ul> | <ul style="list-style-type: none"> <li>• Limitations from using a source of data that is a sample of Medicare recipients</li> <li>• May not be generalizable to all Medicare recipients or patients overall</li> </ul> |



|    | Reference                          | Research Design                                                     | Population, size, & setting                                                                            | Intervention                                                                                                                                              | Outcome or Phenomenon Studied                                                                                                                                                                                                                                                                                                                                                                                                                                                                 | Study Data                                   | Findings                                                                                                                                                                                                                                                                                                                                                                                            | Limitations                                                                                                                                                                                                                                       |
|----|------------------------------------|---------------------------------------------------------------------|--------------------------------------------------------------------------------------------------------|-----------------------------------------------------------------------------------------------------------------------------------------------------------|-----------------------------------------------------------------------------------------------------------------------------------------------------------------------------------------------------------------------------------------------------------------------------------------------------------------------------------------------------------------------------------------------------------------------------------------------------------------------------------------------|----------------------------------------------|-----------------------------------------------------------------------------------------------------------------------------------------------------------------------------------------------------------------------------------------------------------------------------------------------------------------------------------------------------------------------------------------------------|---------------------------------------------------------------------------------------------------------------------------------------------------------------------------------------------------------------------------------------------------|
| 9  | Buchmueller, Carey, & Meille, 2020 | Level II (Quasi-experimental) Observational (analytic) cohort study | State of Kentucky (intervention) compared to State of Indiana (control)                                | State of Kentucky legislation mandating PDMP use Implemented 2012                                                                                         | <ul style="list-style-type: none"> <li>• Total MME prescribed per quarter &amp; average MME per day</li> <li>• Whether the provider writes any opioids prescriptions &amp; number of patients to whom they prescribe opioids</li> <li>• Number of days supplied per patient</li> </ul>                                                                                                                                                                                                        | 2012 - 2013<br>Kentucky PDMP<br>Indiana PDMP | <ul style="list-style-type: none"> <li>• Compared to Indiana, Kentucky's mandated PDMP use associated with decrease in opioid prescribing</li> <li>• Significant number of low-volume providers stopped prescribing opioids altogether after mandated PDMP use.</li> <li>• Also decrease in opioid prescriptions for patients without multiple providers &amp; single-use acute patients</li> </ul> | Possible confounding effect of Kentucky pain clinic regulations                                                                                                                                                                                   |
| 10 | Castillo-Carniglia et al., 2021    | Level II (Quasi-experimental) Observational (analytic) cohort study | Counties in States of California (intervention) compared to counties in Florida & Washington (control) | Changes in California state PDMP Implemented 2016 <ul style="list-style-type: none"> <li>• Proactive reports</li> <li>• Mandatory registration</li> </ul> | <ul style="list-style-type: none"> <li>• Amount of opioids prescribed per 100 state residents</li> <li>• Patients' mean daily MMEs</li> <li>• Prescribers' mean number of opioid prescriptions &amp; mean daily MME prescribed</li> <li>• % of patients with risky prescriptions, defined as: <ul style="list-style-type: none"> <li>• &gt;90 MME/day;</li> <li>• Overlapping prescriptions for opioids and benzodiazepines, or</li> <li>• Multiple opioid prescribers</li> </ul> </li> </ul> | 2012 - 2017<br>Florida PDMP                  | Changes in California PDMP (mandatory registration & proactive reports): <ul style="list-style-type: none"> <li>• associated with decreases in mean daily MMEs prescribed &amp; some risky prescribing behavior</li> <li>• Not associated with significant changes in rate of opioid prescribing &amp; other risky prescribing measures</li> </ul>                                                  | Analysis cannot be parsed to determine: <ul style="list-style-type: none"> <li>• The effect of mandatory registration &amp; proactive reporting separate from each other</li> <li>• Prescribing patterns by provider types or settings</li> </ul> |

|    | Reference          | Research Design                                                     | Population, size, & setting                          | Intervention                                                                  | Outcome or Phenomenon Studied                                                                                                                                                                                                                                                                                                                                           | Study Data                                                                        | Findings                                                                                                                                                                                                                                                                                                                                                               | Limitations                                                                                                                                                                                                                                                                                                                                                    |
|----|--------------------|---------------------------------------------------------------------|------------------------------------------------------|-------------------------------------------------------------------------------|-------------------------------------------------------------------------------------------------------------------------------------------------------------------------------------------------------------------------------------------------------------------------------------------------------------------------------------------------------------------------|-----------------------------------------------------------------------------------|------------------------------------------------------------------------------------------------------------------------------------------------------------------------------------------------------------------------------------------------------------------------------------------------------------------------------------------------------------------------|----------------------------------------------------------------------------------------------------------------------------------------------------------------------------------------------------------------------------------------------------------------------------------------------------------------------------------------------------------------|
| 11 | Chang et al., 2016 | Level II (Quasi-experimental) Observational (analytic) cohort study | States of Florida (intervention) & Georgia (control) | Florida state legislation regarding mandatory PDMP use & pill mill regulation | Comparison of high-volume opioid prescribers versus all other prescribers in: <ul style="list-style-type: none"> <li>• Number &amp; proportion of patients prescribed opioids</li> <li>• Proportion of prescriptions dispensed as opioids</li> <li>• Average MME &amp; days supply per transaction</li> <li>• Total number &amp; volume of opioids dispensed</li> </ul> | 2010 - 2012 IMS Health's LRx Lifelink database (retail prescription transactions) | <ul style="list-style-type: none"> <li>• Compared to Georgia, Florida's high-volume opioid prescribers experienced large relative reductions in number, MME, &amp; volume of opioid prescriptions among high-volume opioid prescribers, but not other providers</li> <li>• Florida opioid prescriptions remained concentrated among high-volume prescribers</li> </ul> | <ul style="list-style-type: none"> <li>• Limitations due to data just coming from retail pharmacy transactions</li> <li>• Possible confounding effect of Florida's pill mill regulation</li> <li>• Analysis not done on whether prescriptions were clinically appropriate or whether transactions were associated with patient morbidity/mortality.</li> </ul> |
| 12 | Chang et al., 2018 | Level II (Quasi-experimental) Observational (analytic) cohort study | States of Florida (intervention) & Georgia (control) | Florida state legislation regarding mandatory PDMP use & pill mill regulation | Comparison of patients with high-risk prescriptions versus all other patients <ul style="list-style-type: none"> <li>• Average MME &amp; average days supplied per transaction,</li> <li>• Total opioid volume across all prescriptions</li> </ul>                                                                                                                      | 2010 - 2012 IMS Health's LRx Lifelink database (retail prescription transactions) | Compared to Georgia, Florida's patients with high-risk prescriptions experienced relative reductions in number, MME, & volume of opioid prescriptions.                                                                                                                                                                                                                 | <ul style="list-style-type: none"> <li>• Limitations due to data just coming from retail pharmacy transactions</li> <li>• Possible confounding effect of Florida's pill mill regulation</li> <li>• Analysis not done on whether prescriptions were clinically appropriate or whether transactions were associated with patient morbidity/mortality.</li> </ul> |

|    | Reference                 | Research Design                                                     | Population, size, & setting                                                           | Intervention                                                                                                                                       | Outcome or Phenomenon Studied                                                                                                                                                                                                                                                                                                                                                                                                              | Study Data                                   | Findings                                                                                                                                                                                                                                                                                                                                                                                                               | Limitations                                                                                                                                                                                                                                                    |
|----|---------------------------|---------------------------------------------------------------------|---------------------------------------------------------------------------------------|----------------------------------------------------------------------------------------------------------------------------------------------------|--------------------------------------------------------------------------------------------------------------------------------------------------------------------------------------------------------------------------------------------------------------------------------------------------------------------------------------------------------------------------------------------------------------------------------------------|----------------------------------------------|------------------------------------------------------------------------------------------------------------------------------------------------------------------------------------------------------------------------------------------------------------------------------------------------------------------------------------------------------------------------------------------------------------------------|----------------------------------------------------------------------------------------------------------------------------------------------------------------------------------------------------------------------------------------------------------------|
| 13 | Danagoulain, et al., 2021 | Level II (Quasi-experimental) Observational (analytic) cohort study | Hospital system (5 hospitals) based in Detroit, Michigan<br><br>Emergency departments | State of Michigan legislation mandating PDMP review & patient informed consent for prescription opioids, & limiting supply of opioid prescriptions | MME & MLE (lorazepam) for opioids & benzodiazepines prescribed for inpatient & emergency department discharges                                                                                                                                                                                                                                                                                                                             | Aug 2016 - March 2019<br>Hospital system EHR | Legislation on opioid prescriptions <ul style="list-style-type: none"> <li>Induced a decline in MME, but rate differed between clinical specialties</li> <li>Associated with an increase in MLE suggesting a potential substitution of opioids for benzodiazepine prescriptions</li> </ul>                                                                                                                             | <ul style="list-style-type: none"> <li>Because several mandates were implemented at the same time, not possible to determine effect of each mandate</li> <li>Findings from a single hospital system may not be generalizable to other settings</li> </ul>      |
| 14 | Derleth et al., 2020      | Level II (Quasi-experimental) Observational (analytic) cohort study | Emergency & urgent care departments in Mayo Clinic Health System (Wisconsin)          | Wisconsin state legislation mandating PDMP use April 2017                                                                                          | <ul style="list-style-type: none"> <li>Amount of opioids (MME) prescribed after an urgent care encounter</li> <li>% of encounters where an opioid was prescribed</li> </ul>                                                                                                                                                                                                                                                                | 2016 - 2017<br>Health System EHR             | PDMP use mandate associated with a reduction in opioids prescribed per encounter & % of encounters that resulted in an opioid prescription.                                                                                                                                                                                                                                                                            | <ul style="list-style-type: none"> <li>Not known if reduction was sustained because of the study period</li> <li>Patient outcomes not known</li> </ul>                                                                                                         |
| 15 | Deyo et al., 2018         | Level II (Quasi-experimental) Observational (analytic) cohort study | State of Oregon                                                                       | State of Oregon PDMP (voluntary use)                                                                                                               | <ul style="list-style-type: none"> <li>Number of patients with at least 1 opioid prescription</li> <li>Mean dose per prescription</li> <li>Number of patients with risky prescriptions, defined as: <ul style="list-style-type: none"> <li><math>\geq 90</math> MME/day</li> <li>Overlapping opioid and benzodiazepine prescriptions (within 30 days), or</li> <li>&gt;3 opioid prescribers in any 2-month interval</li> </ul> </li> </ul> | 2011 - 2014<br>Oregon PDMP                   | <ul style="list-style-type: none"> <li>PDMP implementation associated with decrease in per capita numbers of inappropriate opioid prescriptions &amp; MMEs &amp; number of pills dispensed</li> <li>Registered PDMP users did not show greater declines in study measures than non-registrants</li> <li>Frequent PDMP users continued to prescribe less than infrequent users (change apparent at baseline)</li> </ul> | <ul style="list-style-type: none"> <li>Statistical analysis not adjusted for prescriber demographics or clinical specialty information</li> <li>Changes in established prescribing habits may require more time &amp; longer periods of observation</li> </ul> |

|    | Reference            | Research Design                                                     | Population, size, & setting                                                                                                                             | Intervention                                                                                                         | Outcome or Phenomenon Studied                                                                       | Study Data                                                                                                                                                                                                     | Findings                                                                                                                                                                        | Limitations                                                                                                                                                                                                                                                                                           |
|----|----------------------|---------------------------------------------------------------------|---------------------------------------------------------------------------------------------------------------------------------------------------------|----------------------------------------------------------------------------------------------------------------------|-----------------------------------------------------------------------------------------------------|----------------------------------------------------------------------------------------------------------------------------------------------------------------------------------------------------------------|---------------------------------------------------------------------------------------------------------------------------------------------------------------------------------|-------------------------------------------------------------------------------------------------------------------------------------------------------------------------------------------------------------------------------------------------------------------------------------------------------|
| 16 | Dowell et al., 2016  | Level II (Quasi-experimental) Observational (analytic) cohort study | States of AL, AZ, CA, CO, CT, ID, IL, IN, IA, KY, LA, ME, MA, MI, MN, MS, NE, NV, NM, NC, ND, OH, OK, SC, TN, UT, VT, VA, WV & the District of Columbia | State legislation mandating PDMP use & regulating pain clinics                                                       | MME dispensed per state resident per year                                                           | 2006 - 2013 IMS Health's National Prescription Audit (estimates of prescriptions for each state based on a representative sample of retail pharmacies that dispense nearly 80% of all prescriptions in the US) | States with mandated PDMP use & pain clinic laws saw significant reductions in opioid prescribing rates. Pain clinic laws alone did not significantly reduce opioid prescribing | <ul style="list-style-type: none"> <li>• Limitations due to data just coming from retail pharmacy transactions</li> <li>• Limited post-intervention study period because of how recently some laws were implemented</li> </ul>                                                                        |
| 17 | Graetz, et al., 2023 | Level II (Quasi-experimental) Observational (analytic) cohort study | US National Medicare Oncologists & hematologists who prescribed opioids in the US between 2013 - 2019 (n = 9,746)                                       | PDMP use in states without mandated use, mandated use without cancer exemption, & mandated use with cancer exemption | % of patients with opioid prescriptions                                                             | 2013 - 2019 Medicare Part D                                                                                                                                                                                    | After mandated use of PDMPs, the % of patients prescribed opioids decreased, but there was a bigger decrease in states without a cancer exemption                               | Findings limited to oncologists & hematologists; may not be generalizable to other clinicians                                                                                                                                                                                                         |
| 18 | Gupta, et al., 2021  | Level II (Quasi-experimental) Observational (analytic) cohort study | Emergency department of a suburban tertiary care academic medical center (PA)                                                                           | State of Pennsylvania PDMP implementation in Aug 2016                                                                | Ratio of patients with a numeric pain rating scale >0 & given ≥1 opioid prescription upon discharge | Dec 2014 - May 2018 Medical center EHR                                                                                                                                                                         | PDMP implementation was associated with a significant decrease of opioid prescriptions among patients complaining of severe pain, men, & those between ages 18 - 63 years       | <ul style="list-style-type: none"> <li>• CDC guidelines for prescribing opioids for chronic pain were published in March 2016 so PDMP implementation may not be the sole reason behind reductions</li> <li>• Findings from a single facility may not be generalizable to other ER settings</li> </ul> |

|    | Reference             | Research Design                                                     | Population, size, & setting                                                                     | Intervention                                                                                         | Outcome or Phenomenon Studied                                                                                                                                                                  | Study Data                                                        | Findings                                                                                                                                                                                                                                        | Limitations                                                                                                                                                                                                                                                                                     |
|----|-----------------------|---------------------------------------------------------------------|-------------------------------------------------------------------------------------------------|------------------------------------------------------------------------------------------------------|------------------------------------------------------------------------------------------------------------------------------------------------------------------------------------------------|-------------------------------------------------------------------|-------------------------------------------------------------------------------------------------------------------------------------------------------------------------------------------------------------------------------------------------|-------------------------------------------------------------------------------------------------------------------------------------------------------------------------------------------------------------------------------------------------------------------------------------------------|
| 19 | Haffajee et al., 2018 | Level II (Quasi-experimental) Observational (analytic) cohort study | States with stronger PDMP laws versus other states: KY with MO NM with TX TN with GA NY with NJ | PDMP legislation in study sites<br>Study states with stronger PDMP laws: KY, NM, TN, NY              | <ul style="list-style-type: none"> <li>Number &amp; mean MMEs dispensed</li> <li>Mean MMEs &amp; length of risky prescriptions</li> </ul>                                                      | 2010 - 2014 OptumInsight (private health insurance claims)        | Versus their comparisons, all 4 states with stronger PDMP laws experienced reductions in MMEs & number of opioids dispensed.                                                                                                                    | <ul style="list-style-type: none"> <li>Limitations due to data just coming from private health insurance</li> <li>Patient outcomes not known</li> </ul>                                                                                                                                         |
| 20 | Henry, et al., 2021   | Level II (Quasi-experimental) Observational (analytic) cohort study | State of California                                                                             | Prescription Drug Overdose Prevention Initiative (est 2015) which includes PDMP registration mandate | Monthly per 1000 county residents: <ul style="list-style-type: none"> <li># of opioid prescriptions</li> <li># of patients with &gt;90 MME per day</li> </ul>                                  | 2011 - 2018 California PDMP                                       | Mandatory PDMP registration associated with a significant decrease in rate of opioid prescribing overall & prescribing of >90 MME per day                                                                                                       | Initiative included components other than mandated PDMP registration, & coincided with updates to California PDMP & national overdose prevention efforts; effect of mandatory registration alone not known                                                                                      |
| 21 | Khobrani et al., 2019 | Level II (Quasi-experimental) Observational (analytic) cohort study | 50-bed emergency department in State of Arizona<br>Name not mentioned                           | Arizona state legislation mandating PDMP use Implemented October 2017                                | For discharges from ER for back pain: <ul style="list-style-type: none"> <li>Proportion of patients who were prescribed opioids upon discharge</li> <li>MMEs prescribed per patient</li> </ul> | 2017 - 2018 Medical center's EHR                                  | <ul style="list-style-type: none"> <li>No significant reduction in MMEs or the proportion of patients who were prescribed opioids after discharge</li> <li>There was an increase in the amount of NSAIDs prescribed post-legislation</li> </ul> | <ul style="list-style-type: none"> <li>May not be generalizable to other settings: one facility, small sample</li> <li>No information about individual providers' PDMP use or opioid-prescribing behavior</li> <li>Changes may require more time &amp; longer periods of observation</li> </ul> |
| 22 | Le, et al., 2022      | Level II (Quasi-experimental) Observational (analytic) cohort study | US National Patients with a new cancer diagnosis between Jan 2014 - Dec 2014                    | PDMP registration & use mandates in the US                                                           | <ul style="list-style-type: none"> <li>% patients with opioid prescription</li> <li>Total days, daily MED &amp; cumulative MED of opioid prescriptions</li> </ul>                              | 2013 - 2015 IQVIA Inc PharMetrics Plus data (prescription claims) | PDMP registration & use mandates were associated with a reduction in length of opioid treatment & cumulative MED after initial cancer diagnosis                                                                                                 | Categorization of state PDMP policies into use & registration mandates did not capture other policy differences between states (e.g., cancer exemption)                                                                                                                                         |

|    | Reference          | Research Design                                                        | Population, size, & setting    | Intervention                                                                                                                                                                                                                                                                                                                                                                                     | Outcome or Phenomenon Studied                                                                                                                                                                                                                                                                    | Study Data                                                    | Findings                                                                                                                    | Limitations                                                                                                                                                                                                                                                                     |
|----|--------------------|------------------------------------------------------------------------|--------------------------------|--------------------------------------------------------------------------------------------------------------------------------------------------------------------------------------------------------------------------------------------------------------------------------------------------------------------------------------------------------------------------------------------------|--------------------------------------------------------------------------------------------------------------------------------------------------------------------------------------------------------------------------------------------------------------------------------------------------|---------------------------------------------------------------|-----------------------------------------------------------------------------------------------------------------------------|---------------------------------------------------------------------------------------------------------------------------------------------------------------------------------------------------------------------------------------------------------------------------------|
| 23 | Liang et al., 2021 | Level II (Quasi-experimental) Observational (analytic) cohort study    | US National Medicaid enrollees | PDMP data use mandates for benzodiazepines                                                                                                                                                                                                                                                                                                                                                       | For benzodiazepine prescriptions; per state per quarter per 100 Medicaid enrollees: <ul style="list-style-type: none"> <li>• Quantity</li> <li>• MDE</li> <li>• Overall spending</li> </ul>                                                                                                      | 2010 - 2017 Medicaid State Drug Utilization data (outpatient) | PDMP mandates for benzodiazepines were not associated with quantity, dosage, or money spent on benzodiazepine prescriptions | <ul style="list-style-type: none"> <li>• PDMP benzodiazepine mandates were enacted relatively recently so data may not reflect the full realized effect of the mandate</li> <li>• Data may not be generalizable to emergency departments or non-Medicaid populations</li> </ul> |
| 24 | Lin et al., 2018   | Level II (Quasi-experimental) Observational (analytic) cross-sectional | US National                    | US states & their PDMP legislation categorized as: <ul style="list-style-type: none"> <li>• No PDMP</li> <li>• Voluntary registration &amp; use</li> <li>• Mandatory registration</li> <li>• Mandatory use</li> </ul>                                                                                                                                                                            | For a sample of ambulatory care visits for chronic pain, back pain & arthritis/joint pain: <ul style="list-style-type: none"> <li>• Yes/no: visit resulted in a prescription for pain (both opioid and non-opioid agents)</li> <li>• Yes/no: visit resulted in an opioid prescription</li> </ul> | 2012 National Ambulatory Medical Care Study (NAMCS)           | Stronger PDMP laws not associated with reductions in amount of opioids & other pain medications prescribed                  | <ul style="list-style-type: none"> <li>• Classification of PDMPs may be too coarse</li> <li>• Study excluded records from 11 less populous states &amp; DC</li> </ul>                                                                                                           |
| 25 | Lin et al., 2019   | Level II (Quasi-experimental) Observational (analytic) cross-sectional | US National                    | States' PDMP legislation categorized as: <ul style="list-style-type: none"> <li>• No PDMP</li> <li>• Voluntary registration &amp; use</li> <li>• Mandatory registration</li> <li>• Mandatory use</li> <li>• State PDMP data sharing agreements with: <ul style="list-style-type: none"> <li>• no border states</li> <li>• all border states</li> <li>• some border states</li> </ul> </li> </ul> | For a sample of ambulatory care visits for chronic pain, back pain & arthritis/joint pain: <ul style="list-style-type: none"> <li>• Yes/no: visit resulted in a prescription for pain (both opioid and non-opioid agents)</li> <li>• Yes/no: visit resulted in an opioid prescription</li> </ul> | 2014 National Ambulatory Medical Care Study (NAMCS)           | PDMP data sharing agreements were not associated with reductions in amount of opioids & other pain medications prescribed   | Classification of PDMPs & PDMP data-sharing agreements may be too coarse                                                                                                                                                                                                        |

|    | Reference                   | Research Design                                                     | Population, size, & setting | Intervention                                                                                                                                                                                                                                                                                                             | Outcome or Phenomenon Studied                                                                                                                                                                       | Study Data                                                                                  | Findings                                                                                                                                                                                                                                                                                                                                                                                                                                                 | Limitations                                                                                                                                                                                                                                                                              |
|----|-----------------------------|---------------------------------------------------------------------|-----------------------------|--------------------------------------------------------------------------------------------------------------------------------------------------------------------------------------------------------------------------------------------------------------------------------------------------------------------------|-----------------------------------------------------------------------------------------------------------------------------------------------------------------------------------------------------|---------------------------------------------------------------------------------------------|----------------------------------------------------------------------------------------------------------------------------------------------------------------------------------------------------------------------------------------------------------------------------------------------------------------------------------------------------------------------------------------------------------------------------------------------------------|------------------------------------------------------------------------------------------------------------------------------------------------------------------------------------------------------------------------------------------------------------------------------------------|
| 26 | Maierhofer, et al., 2021    | Level II (Quasi-experimental) Observational (analytic) cohort study | State of North Carolina     | State of North Carolina policy on opioid prescribing: <ul style="list-style-type: none"> <li>• PDMP implementation (2010)</li> <li>• State medical board initiative investigating high-volume prescribers (May 2016)</li> <li>• Legislation limiting opioid prescribing &amp; mandating PDMP use (April 2018)</li> </ul> | For opioid prescriptions: <ul style="list-style-type: none"> <li>• Rate of prescribing to new patients</li> <li>• % of ongoing prescriptions</li> <li>• Total days supply</li> <li>• MME</li> </ul> | Jan 2006 - Aug 2018<br>Claims data from private health insurance provider in North Carolina | <ul style="list-style-type: none"> <li>• Rates of new &amp; ongoing opioid prescriptions were not associated to the implementation of a voluntary-use PDMP but sharply declined following the medical board initiative &amp; legislative action</li> <li>• Mean total days' supply declined sharply after 2018 legislation limiting opioid prescribing</li> <li>• MME declined steadily without notable impact from any of the three policies</li> </ul> | <ul style="list-style-type: none"> <li>• Other notable factors that could have influenced study results: OxyContin reformulation (2010) &amp; CDC guidelines for treating chronic pain (2016)</li> <li>• Dataset did not include uninsured, Medicaid, &amp; Medicare patients</li> </ul> |
| 27 | Manders & Abd-Elsayed, 2020 | Level II (Quasi-experimental) Observational (analytic) cohort study | State of Wisconsin          | Wisconsin state legislation mandating PDMP use<br>Implemented April 2017                                                                                                                                                                                                                                                 | Number of monthly prescriptions dispensed divided by drug classes (opioids, benzodiazepines, stimulants & other)                                                                                    | 2015 - 2019<br>Wisconsin PDMP                                                               | Mandated PDMP use was associated with significant reduction in opioid & benzodiazepine subgroups. However, the number of stimulants was preserved or slightly increased.                                                                                                                                                                                                                                                                                 | <ul style="list-style-type: none"> <li>• Lacked comparison state</li> <li>• Wisconsin PDMP has extra functionalities, like proactive reporting, that may have augmented the effects of the study</li> </ul>                                                                              |

|    | Reference              | Research Design                                                        | Population, size, & setting                                                                                              | Intervention                                                                                                                              | Outcome or Phenomenon Studied                                                                                                                                                                                                                                                  | Study Data                                                          | Findings                                                                                                                                                                                                                                                                                  | Limitations                                                                                                                                                                                                                                                                                                                         |
|----|------------------------|------------------------------------------------------------------------|--------------------------------------------------------------------------------------------------------------------------|-------------------------------------------------------------------------------------------------------------------------------------------|--------------------------------------------------------------------------------------------------------------------------------------------------------------------------------------------------------------------------------------------------------------------------------|---------------------------------------------------------------------|-------------------------------------------------------------------------------------------------------------------------------------------------------------------------------------------------------------------------------------------------------------------------------------------|-------------------------------------------------------------------------------------------------------------------------------------------------------------------------------------------------------------------------------------------------------------------------------------------------------------------------------------|
| 28 | McDonald, et al., 2019 | Level I<br>Experimental (randomized) parallel group                    | State of Nevada                                                                                                          | Unsolicited notification, to their doctors, of the prescription histories of patients with multiple prescriptions from multiple providers | Schedule II-IV controlled drugs dispensed to patients with multiple opioid prescriptions from multiple prescriptions: <ul style="list-style-type: none"> <li>• Number of distinct providers &amp; pharmacies used</li> <li>• Number &amp; MMEs of opioids dispensed</li> </ul> | 2011 - 2014 Nevada PDMP                                             | Providers who received unsolicited reporting were more likely to discontinue prescribing when compared to providers who were not notified.<br>But patients with multiple prescriptions from multiple providers appeared to replace providers who would not supply them with prescriptions | <ul style="list-style-type: none"> <li>• Study only applies to effectiveness of unsolicited notification, not effectiveness of PDMPs in general</li> <li>• The study cannot provide information about why prescribers continued prescribing to patients with multiple providers nor why patients had multiple providers.</li> </ul> |
| 29 | McGinty, et al., 2022  | Level II (Quasi-experimental)<br>Observational (analytic) cohort study | 13 states that implemented a single opioid-prescribing- related law between 2008 - 2019<br>For PDMP law analysis: CO, ID | Implementation of a single state law involving prescribing caps, pill mills, or PDMP use or registration                                  | <ul style="list-style-type: none"> <li>• Proportion of patients receiving any opioid or nonopioid pain treatment per month</li> <li>• Mean days' supply &amp; MME of opioids per day, per patient, per month</li> </ul>                                                        | 2008 - 2019 IBM MarketScan (inpatient, outpatient, pharmacy claims) | Implementation of a single state law involving prescribing caps, pills mills, or PDMP use or registration was not associated with a change in opioid or nonopioid pain treatment                                                                                                          | <ul style="list-style-type: none"> <li>• Results may not be generalizable to the uninsured or those on public insurance</li> <li>• Data cannot ascertain clinical appropriateness of the prescriptions</li> </ul>                                                                                                                   |



|    | Reference           | Research Design                                                     | Population, size, & setting                                                                                                                           | Intervention                                                                                                       | Outcome or Phenomenon Studied                                                                                                                                                            | Study Data                                                    | Findings                                                                                                                                                                                                                                                                                                                                                | Limitations                                                                                                                                                                                                                                                                                                                                                                                                                                                        |
|----|---------------------|---------------------------------------------------------------------|-------------------------------------------------------------------------------------------------------------------------------------------------------|--------------------------------------------------------------------------------------------------------------------|------------------------------------------------------------------------------------------------------------------------------------------------------------------------------------------|---------------------------------------------------------------|---------------------------------------------------------------------------------------------------------------------------------------------------------------------------------------------------------------------------------------------------------------------------------------------------------------------------------------------------------|--------------------------------------------------------------------------------------------------------------------------------------------------------------------------------------------------------------------------------------------------------------------------------------------------------------------------------------------------------------------------------------------------------------------------------------------------------------------|
| 30 | Meara, et al., 2016 | Level II (Quasi-experimental) Observational (analytic) cohort study | US National Disabled Medicare beneficiaries 21-64 years; excluded those with cancer or end-stage renal disease, or who were receiving palliative care | US legislation over controlled substances between 2006 - 2012; PDMP-related mandates were included in the analysis | Annual prevalence of patients with: <ul style="list-style-type: none"> <li>• <math>\geq 4</math> opioid prescribers</li> <li>or</li> <li>• <math>&gt; 120</math> mg daily MME</li> </ul> | 2006 - 2012 Medicare Parts A, B, & D (fee for service) claims | PDMP implementation was not associated with reductions in potentially hazardous opioid prescriptions                                                                                                                                                                                                                                                    | <ul style="list-style-type: none"> <li>• Study population has higher rates of opioid use, coexisting complex medical conditions, &amp; poverty; results may not be generalizable to the general population</li> <li>• Substantial legislation surrounding controlled substances were passed after the study period; the data would not have reflected the effect of these laws</li> <li>• Laws may have needed more time to effect prescribing patterns</li> </ul> |
| 31 | Meinhofer, 2018     | Level II (Quasi-experimental) Observational (analytic) cohort study | US National PDMP-related legislation                                                                                                                  | Laws related to PDMP access & use                                                                                  | Grams per 100,000 persons of opioids & stimulants in Schedules I, II, & some from Schedule III                                                                                           | 2000 - 2013 DEA ARCOS (medication sales)                      | <ul style="list-style-type: none"> <li>• PDMP implementation &amp; PDMP data access to healthcare providers not associated with drug quantities</li> <li>• However, required PDMP use reduced prescription opioid and stimulant quantities</li> <li>• There is potential substitution of controlled substance prescriptions to illegal drugs</li> </ul> | Limitations noted about the analysis of overdose deaths, but that outcome is not covered in this literature review                                                                                                                                                                                                                                                                                                                                                 |

|    | Reference          | Research Design                                                     | Population, size, & setting                                                                                                                      | Intervention                                                                                                                  | Outcome or Phenomenon Studied                                                                                                                                                                      | Study Data                                                                             | Findings                                                                                                                                                                                                                                                                                                            | Limitations                                                                                                                                                                                                                                                                                                                                          |
|----|--------------------|---------------------------------------------------------------------|--------------------------------------------------------------------------------------------------------------------------------------------------|-------------------------------------------------------------------------------------------------------------------------------|----------------------------------------------------------------------------------------------------------------------------------------------------------------------------------------------------|----------------------------------------------------------------------------------------|---------------------------------------------------------------------------------------------------------------------------------------------------------------------------------------------------------------------------------------------------------------------------------------------------------------------|------------------------------------------------------------------------------------------------------------------------------------------------------------------------------------------------------------------------------------------------------------------------------------------------------------------------------------------------------|
| 32 | Moyo et al., 2017  | Level II (Quasi-experimental) Observational (analytic) cohort study | Medicare States with online access to PDMPs versus states without online access to PDMPs: FL with GA LA with AR NE with WI NJ with MD VT with NH | PDMP implementation in the studied states as defined as the date when prescribers & dispensers had access to PDMP data online | Mean daily MME, number & total volume of Schedule II - V opioid prescriptions                                                                                                                      | 2007 - 2012 Prescription claims of random 5% subsample of Medicare Part D participants | PDMPs associated with reductions in some measures of opioid amount (Schedule II & III), but not with others (total opioids & Schedules IV & V).                                                                                                                                                                     | <ul style="list-style-type: none"> <li>• May not be able to generalize findings to non-study states</li> <li>• Dissimilarities in how PDMPs are structured between different states. may have influenced the program's impact on outcomes.</li> </ul>                                                                                                |
| 33 | Myrga et al., 2020 | Level II (Quasi-experimental) Observational (analytic) cohort study | Large academic hospital (not named) in Western Pennsylvania<br><br>Patients who underwent prostate or renal surgery                              | Pennsylvania state legislation mandating PDMP use Implemented January 2017                                                    | Opioid prescriptions upon discharge: <ul style="list-style-type: none"> <li>• Amount of 5 mg oxycodone equivalents prescribed</li> <li>• % of patients receiving an opioid prescription</li> </ul> | 2016 - 2017 Medical center EHR                                                         | <ul style="list-style-type: none"> <li>• Overall, for opioid naive &amp; opioid exposed patients, mandated PDMP use was associated with a decrease in median 5 mg oxycodone equivalents, but not % of patients receiving an opioid prescription.</li> <li>• However, results differed between physicians</li> </ul> | <ul style="list-style-type: none"> <li>• May not be generalizable to other settings: one facility, small sample</li> <li>• Changes may not have been sustained</li> <li>• Possible confounding effect of CDC Guidelines on Chronic Opioid Prescribing (March 2016)</li> <li>• No determination made as to appropriateness of prescription</li> </ul> |

|    | Reference            | Research Design                                                     | Population, size, & setting                                                                                                        | Intervention                                                     | Outcome or Phenomenon Studied                                                                                                                                                                                                                                                       | Study Data                                          | Findings                                                                                                                                                                                                                                                                        | Limitations                                                                                                                                                              |
|----|----------------------|---------------------------------------------------------------------|------------------------------------------------------------------------------------------------------------------------------------|------------------------------------------------------------------|-------------------------------------------------------------------------------------------------------------------------------------------------------------------------------------------------------------------------------------------------------------------------------------|-----------------------------------------------------|---------------------------------------------------------------------------------------------------------------------------------------------------------------------------------------------------------------------------------------------------------------------------------|--------------------------------------------------------------------------------------------------------------------------------------------------------------------------|
| 34 | Nguyen, et al., 2023 | Level II (Quasi-experimental) Observational (analytic) cohort study | State of Kentucky as compared to the State of Indiana (2012 - 2013)                                                                | State of Kentucky legislation mandating PDMP use (July 2012)     | % of patients (per 1000) that have ≥1 opioid & ≥1 benzodiazepine prescription that overlap for at least 7 days, & whether the overlapping prescriptions were from a single prescriber or separate prescribers                                                                       | 2010 - 2016 Kentucky PDMP                           | Kentucky's mandated PDMP use was associated with a decrease in the rate of overlapping opioid - benzodiazepine prescriptions, mostly because of a reduction in initiation of overlapping prescriptions or a discontinuation of either the opioid or benzodiazepine prescription | A confounding factor could be Kentucky's regulation of pain clinics.                                                                                                     |
| 35 | Ozturk et al., 2021  | Level II (Quasi-experimental) Observational (analytic) cohort study | US National                                                                                                                        | Online access to PDMP became available                           | For adults (18 - 64 years) without cancer-related pain & with disability conditions: <ul style="list-style-type: none"> <li>• Having any opioid prescription</li> <li>• Number &amp; cumulative MMEs of opioid prescriptions</li> <li>• Incidence of extended opioid use</li> </ul> | 2000 - 2014 Medical Expenditure Panel Survey (MEPS) | PDMPs did not reduce initial or ongoing opioid prescriptions for individuals with disabilities who use opioids                                                                                                                                                                  | <ul style="list-style-type: none"> <li>• Possible confounding effect of pill mill laws</li> <li>• No determination made as to appropriateness of prescription</li> </ul> |
| 36 | Rubin, et al., 2022  | Level II (Quasi-experimental) Observational (analytic) cohort study | Lahey Hospital & Medical Center (Burlington, MA) or Boston Medical Center (Boston, MA)<br>Patients who underwent certain surgeries | State of Massachusetts legislation mandating PDMP use (Oct 2016) | MME & length of days of opioid prescriptions upon discharge for patients who underwent tonsillectomy, parotidectomy, thyroidectomy or direct laryngoscopy & biopsy with or without rigid esophagoscopy and/or rigid bronchoscopy                                                    | Oct 2015 - Oct 2019 Medical Centers' EHRs           | There was a significant decrease in mean overall MME prescribed after PDMP implementation                                                                                                                                                                                       | Prescription data may not reflect actual use by the patient                                                                                                              |

|    | Reference             | Research Design                                                           | Population, size, & setting                                      | Intervention                                                                                                                                                                                                                                                                                                                                                                                               | Outcome or Phenomenon Studied                                                                                                                                                                                                                                 | Study Data                                                                                                                                                                                                                                                                                                                                  | Findings                                                                                                                                                                                                                                                                                                                                                                                                                                                                                | Limitations                                                                                                                                                                                 |
|----|-----------------------|---------------------------------------------------------------------------|------------------------------------------------------------------|------------------------------------------------------------------------------------------------------------------------------------------------------------------------------------------------------------------------------------------------------------------------------------------------------------------------------------------------------------------------------------------------------------|---------------------------------------------------------------------------------------------------------------------------------------------------------------------------------------------------------------------------------------------------------------|---------------------------------------------------------------------------------------------------------------------------------------------------------------------------------------------------------------------------------------------------------------------------------------------------------------------------------------------|-----------------------------------------------------------------------------------------------------------------------------------------------------------------------------------------------------------------------------------------------------------------------------------------------------------------------------------------------------------------------------------------------------------------------------------------------------------------------------------------|---------------------------------------------------------------------------------------------------------------------------------------------------------------------------------------------|
| 37 | Sacarny, et al., 2023 | Level I<br>Experimental (randomized) parallel group                       | State of Minnesota                                               | <p>3 different letters from the Minnesota Board of Pharmacy to physicians with patients with ≥5 days of overlapping prescriptions for opioids– benzodiazepines or opioids– gabapentinoids</p> <ol style="list-style-type: none"> <li>1. Informing them about mandated PDMP use</li> <li>2. Listing patients on their panel who have co- prescriptions</li> <li>3. Letter with both of the above</li> </ol> | <ul style="list-style-type: none"> <li>• % of physicians who used the PDMP at all during the study period</li> <li>• # of patients with co-prescriptions</li> <li>• # of physicians who registered for PDMP access</li> </ul>                                 | <p>2021<br/>n = 12,000 physicians with patients with co-prescriptions between Nov 2020 - Feb 2021<br/>Assigned to one of 4 study branches: Letter 1 (see “intervention” column), Letter 2, Letter 3, or No Letter</p> <p>Minnesota PDMP data was used to identify physicians &amp; track outcomes for 60 days after the initial mailing</p> | <ul style="list-style-type: none"> <li>• Study branches for Letter 1 (inform re: PDMP use mandate) &amp; Letter 3 (PDMP use mandate + list of patients with co-prescriptions) were associated with increased PDMP use &amp; PDMP registration, but not with a change in the # of patients with co-prescriptions</li> <li>• Study branch Letter 2 (list of patients with co-prescriptions) was not associated with a change in the # of searches or the # of co-prescriptions</li> </ul> | Only 1 state included in the study - results may not be generalizable to other states                                                                                                       |
| 38 | Sacks et al., 2021    | Level II<br>(Quasi-experimental)<br>Observational (analytic) cohort study | States of AK, AR, AZ, CA, CT, DE, GA, IL, IN, KY, LA, MA, MD, MN | Legislation mandating PDMP use implemented by 2018                                                                                                                                                                                                                                                                                                                                                         | <p>For 20% random sample of all enrollees &amp; 100% sample of all patients who ever filled an opioid prescription:</p> <ul style="list-style-type: none"> <li>• Average MMEs per day of opioids</li> <li>• Number of refills in the initial spell</li> </ul> | 2007 - 2018<br>Claims database of large, national insurer with employer- sponsored plans & Affordable Care Act Exchange plans                                                                                                                                                                                                               | Mandatory use of PDMPs associated with reduction in days supply of opioids and number of refills dispensed to new users                                                                                                                                                                                                                                                                                                                                                                 | <ul style="list-style-type: none"> <li>• Not known if reduction was sustained past the study period</li> <li>• Limitations from using a source of data from one national insurer</li> </ul> |

|    | Reference                      | Research Design                                                     | Population, size, & setting                                                                       | Intervention                                                              | Outcome or Phenomenon Studied                                                                                                                                                                                                                                                                                                                                                                                             | Study Data                               | Findings                                                                                                                                                                                                                                                                                                                                                 | Limitations                                                                                                                                                                                                                 |
|----|--------------------------------|---------------------------------------------------------------------|---------------------------------------------------------------------------------------------------|---------------------------------------------------------------------------|---------------------------------------------------------------------------------------------------------------------------------------------------------------------------------------------------------------------------------------------------------------------------------------------------------------------------------------------------------------------------------------------------------------------------|------------------------------------------|----------------------------------------------------------------------------------------------------------------------------------------------------------------------------------------------------------------------------------------------------------------------------------------------------------------------------------------------------------|-----------------------------------------------------------------------------------------------------------------------------------------------------------------------------------------------------------------------------|
| 39 | Sahebi-Fakhrabad, et al., 2023 | Level II (Quasi-experimental) Observational (analytic) cohort study | State of Tennessee & neighboring states: KY, VA, WV, OH, IN, IL, NC, SC, GA, AL, MS, AR, & MO     | State PDMP & pill mill regulations in Tennessee & neighboring states      | Supply of opioid prescriptions (per capita pill volume) at the level of dispensers & distributors (excluding manufacturers)                                                                                                                                                                                                                                                                                               | 2006 - 2014 DEA ARCOS (medication sales) | <ul style="list-style-type: none"> <li>Both PDMP &amp; pill mill regulations impact the supply of opioids; pill mills appeared to have the greater impact</li> <li>However, opioids may be shifted from states with stricter regulations to states with laxer regulations.</li> </ul>                                                                    | Not noted by authors                                                                                                                                                                                                        |
| 40 | Strickler et al., 2019         | Level II (Quasi-experimental) Observational (analytic) cohort study | States of KY, OH, WV (intervention) versus CA & VA (control - no PDMP use mandate as of Dec 2016) | PDMP use mandates in between 2010 - 2015 in KY, OH & WV                   | By quarter, rate of (per 100,000 state residents): <ul style="list-style-type: none"> <li>Prescriptions for all opioids</li> <li>Patients with risky prescriptions, defined as: <ul style="list-style-type: none"> <li>5+ pharmacies</li> <li>5+ prescribers</li> <li>2 overlapping opioid prescriptions</li> <li>Overlapping opioid &amp; benzodiazepine prescription</li> <li>90+ cumulative MME</li> </ul> </li> </ul> | 2010 - 2016 Data from state PDMP         | <ul style="list-style-type: none"> <li>Rate of prescriptions for all opioids &amp; rate of risky prescriptions decreased in KY &amp; OH (not WV)</li> <li>Authors conclude that PDMP mandates have the potential to reduce risky opioid prescribing practices. Variation in the laws may explain why the effectiveness varied between states.</li> </ul> | Possible confounding effect of state laws regarding opioid use disorder (OUD) prevention that do not pertain to PDMP (e.g., pill mill regulation)                                                                           |
| 41 | Suffoletto et al., 2018        | Level II (Quasi-experimental) Observational (analytic) cohort study | 15 different hospitals in a single health system in Pennsylvania Emergency departments            | Pennsylvania state legislation mandating PDMP use Implemented August 2016 | % of patients discharged with an opioid prescription & with a prescription for >12 tablets before & after PDMP mandate                                                                                                                                                                                                                                                                                                    | 2015 - 2017 Health system EHR            | <ul style="list-style-type: none"> <li>Opioids prescribing rate decreased pre- &amp; post-legislation, but the rate of decrease accelerated after the legislation.</li> <li>There was heterogeneity in opioid prescribing across hospitals &amp; patient diagnosis</li> </ul>                                                                            | <ul style="list-style-type: none"> <li>Possible confounding effect of CDC Guidelines on Chronic Opioid Prescribing (March 2016)</li> <li>Analysis not done on whether prescriptions were clinically appropriate.</li> </ul> |

|    | Reference           | Research Design                                                     | Population, size, & setting                                                                | Intervention                                                                          | Outcome or Phenomenon Studied                                                                                                       | Study Data                                                                                              | Findings                                                                                                                                                                                                                                                                                                                                                  | Limitations                                                                                                                                                                                                                                                                 |
|----|---------------------|---------------------------------------------------------------------|--------------------------------------------------------------------------------------------|---------------------------------------------------------------------------------------|-------------------------------------------------------------------------------------------------------------------------------------|---------------------------------------------------------------------------------------------------------|-----------------------------------------------------------------------------------------------------------------------------------------------------------------------------------------------------------------------------------------------------------------------------------------------------------------------------------------------------------|-----------------------------------------------------------------------------------------------------------------------------------------------------------------------------------------------------------------------------------------------------------------------------|
| 42 | Sun et al., 2018    | Level II (Quasi-experimental) Observational (analytic) cohort study | Non-federal Emergency Departments (ED) in the State of Washington<br><br>Medicaid patients | Automated "pushed" PDMP queries on patients with risky prescriptions                  | Pre- & post-automated queries:<br>Number & MME of Schedule II or III opioids prescribed to Medicaid recipient after an ED encounter | 2013 - 2015<br>Washington State Health Care Authority                                                   | <ul style="list-style-type: none"> <li>Automated PDMP queries were not significantly associated with reductions in opioid prescribing or quantities even in patients with previous potentially problematic opioid prescriptions</li> <li>Findings suggest limited efficacy of automated queries in reducing opioid prescribing in ED settings.</li> </ul> | <ul style="list-style-type: none"> <li>Limitations due to focus on Medicaid beneficiaries, in ED, in a single state</li> <li>Analysis not done per provider</li> <li>Not confirmed whether ED providers accessed the automated query; only that it was generated</li> </ul> |
| 43 | Toce, et al., 2023a | Level II (Quasi-experimental) Observational (analytic) cohort study | US National                                                                                | States with legislation mandating PDMP review<br>Control: States without this mandate | % of enrollees (per 100) with opioid prescriptions for adolescents & young adults (13 - 25 years)                                   | Jan 2008 - Dec 2019<br>Unnamed commercial health insurance company with 10% of US market share (claims) | Mandated PDMP use mandates were associated with a significant decrease in mean annual % opioids prescriptions for adolescents & young adults                                                                                                                                                                                                              | <ul style="list-style-type: none"> <li>Findings may not be generalizable to other populations, e.g., those on public insurance or the uninsured</li> <li>Cannot exclude the effect of other factors on opioid prescribing or the presence of secular changes</li> </ul>     |
| 44 | Toce, et al., 2023b | Level II (Quasi-experimental) Observational (analytic) cohort study | US National                                                                                | States with legislation mandating PDMP review<br>Control: States without this mandate | % of enrollees (per 100) with benzodiazepine prescriptions for adolescents & young adults (13 - 25 years)                           | Jan 2008 - Dec 2019<br>Unnamed commercial health insurance company with 10% of US market share (claims) | Mandated PDMP use mandates were associated with a significant decrease in mean annual % benzodiazepine prescriptions for adolescents & young adults                                                                                                                                                                                                       | <ul style="list-style-type: none"> <li>Findings may not be generalizable to other populations, e.g., those on public insurance or the uninsured</li> <li>Unable to ascertain whether prescriptions were clinically appropriate</li> </ul>                                   |

|    | Reference               | Research Design                                                                   | Population, size, & setting                                                                                                                                                                                                                     | Intervention                                                                                                              | Outcome or Phenomenon Studied                                                                                                                                                                                                                                                                                                                                                                                                   | Study Data                                                         | Findings                                                                                                                                                                                                                                                                                                                                                                                                                                                            | Limitations                                                                                                                                                                               |
|----|-------------------------|-----------------------------------------------------------------------------------|-------------------------------------------------------------------------------------------------------------------------------------------------------------------------------------------------------------------------------------------------|---------------------------------------------------------------------------------------------------------------------------|---------------------------------------------------------------------------------------------------------------------------------------------------------------------------------------------------------------------------------------------------------------------------------------------------------------------------------------------------------------------------------------------------------------------------------|--------------------------------------------------------------------|---------------------------------------------------------------------------------------------------------------------------------------------------------------------------------------------------------------------------------------------------------------------------------------------------------------------------------------------------------------------------------------------------------------------------------------------------------------------|-------------------------------------------------------------------------------------------------------------------------------------------------------------------------------------------|
| 45 | Townsend, et al., 2022  | Level II (Quasi-experimental) Observational (analytic) cohort study               | US National Black vs white patients; < 65 years old not diagnosed with cancer or receiving palliative care or                                                                                                                                   | PDMP mandated use                                                                                                         | Binary variables: <ul style="list-style-type: none"> <li>• Ave daily dose of <math>\geq 90</math> MME</li> <li>• <math>\geq 7</math> days of overlapping opioid prescriptions</li> <li>• <math>\geq 1</math> day of concurrent opioid &amp; benzodiazepine prescriptions</li> <li>• <math>&gt; 3</math> prescribers for opioids prescriptions</li> <li>• <math>&gt; 3</math> pharmacies to fill opioid prescriptions</li> </ul> | 2007 - 2018<br>Optum Clinformatics Data Mart (prescription claims) | PDMP mandates appeared to reduce rates of all outcomes of potentially inappropriate prescriptions, but in 4 out of 5, effects appeared limited to, or larger in, Black patients compared with White patients                                                                                                                                                                                                                                                        | <ul style="list-style-type: none"> <li>• Data not available on prescriptions paid for in cash</li> <li>• Unable to ascertain whether prescriptions were clinically appropriate</li> </ul> |
| 46 | Underwood, et al., 2021 | Mixed methods<br><br>Observational (analytic) cohort study<br><br>Document review | Jurisdictions funded by the CDC's Prevention for States (PfS) program: AZ, CA, CO, CT, DE, IL, IN, KY, ME, MD, MA, NE, NV, NM, NY, NC, OH, OK, OR, PA, RI, SC, TN, UT, VT, VA, WA, WV, WI<br><br>Compared to jurisdictions that were not funded | Prevention for States funding was for: enhancing PDMP use & implementing community or insurer/health system interventions | Total # of prescriptions per month for $\geq 90$ MME daily, divided by census population & multiplied by 100                                                                                                                                                                                                                                                                                                                    | 2014 - 2019<br>IQVIA Xponent data (retail pharmacies)              | <ul style="list-style-type: none"> <li>• High-dose opioid dispensing declined in all states, regardless of whether they received PfS funding between 2014 - 2019</li> <li>• High-dose opioid dispensing rates were not significantly different between those who received funding &amp; those who did not</li> <li>• However, PfS activities, including real-time PDMP reporting, were associated with decreases in high-dose dispensing rates over time</li> </ul> | PfS activities may have contributed to changes, but causal conclusions cannot be reached because of potential other efforts to address the opioid overdose epidemic                       |

|    | Reference               | Research Design                                                                   | Population, size, & setting                                                                                                                                                                                                                     | Intervention                                                                                                              | Outcome or Phenomenon Studied                                                                                                                                                                                                                                                                                                                                                                 | Study Data                                                                                                                                                                                                               | Findings                                                                                                                                                                                                                                                                                                                                                                                                   | Limitations                                                                                                                                                                                                                             |
|----|-------------------------|-----------------------------------------------------------------------------------|-------------------------------------------------------------------------------------------------------------------------------------------------------------------------------------------------------------------------------------------------|---------------------------------------------------------------------------------------------------------------------------|-----------------------------------------------------------------------------------------------------------------------------------------------------------------------------------------------------------------------------------------------------------------------------------------------------------------------------------------------------------------------------------------------|--------------------------------------------------------------------------------------------------------------------------------------------------------------------------------------------------------------------------|------------------------------------------------------------------------------------------------------------------------------------------------------------------------------------------------------------------------------------------------------------------------------------------------------------------------------------------------------------------------------------------------------------|-----------------------------------------------------------------------------------------------------------------------------------------------------------------------------------------------------------------------------------------|
| 47 | Underwood, et al., 2023 | Mixed methods<br><br>Observational (analytic) cohort study<br><br>Document review | Jurisdictions funded by the CDC's Prevention for States (PfS) program: AZ, CA, CO, CT, DE, IL, IN, KY, ME, MD, MA, NE, NV, NM, NY, NC, OH, OK, OR, PA, RI, SC, TN, UT, VT, VA, WA, WV, WI<br><br>Compared to jurisdictions that were not funded | Prevention for States funding was for: enhancing PDMP use & implementing community or insurer/health system interventions | Analysis of which PFs activities were associated with changes in opioid dispensing outcomes<br>Collected data on:<br><ul style="list-style-type: none"> <li>PfS activities implemented</li> <li>MME per capita</li> </ul> Substantive opioid dispensing outcome = if MME per capita was below mean MME for 2014 - 2019<br>Determined whether activities were necessary (causal) or sufficient | 2016 - 2019<br>PfS annual progress reports<br>2014 - 2019<br>IQVIA Xponent data (retail pharmacies)<br>Dec 2017 - Feb 2018<br>Semi-structured interviews with program director, program manager, & one other team member | Three combinations of activities were sufficient for > ave state MME reduction; the combination that included PDMP-related activities was:<br>Proactive PDMP reporting, but not moving towards real-time PDMP data reporting + improving uptake of opioid prescribing guidelines<br><br>Authors suggested that states can best reduce opioid dispensing by building upon existing policies & interventions | <ul style="list-style-type: none"> <li>Study could not control for other contextual factors</li> <li>There is no standard for what an appropriate mean MME is</li> </ul>                                                                |
| 48 | Wang, et al., 2021      | Level II (Quasi-experimental)<br>Observational (analytic) cohort study            | University of Pennsylvania School of Dental Medicine Philadelphia, PA                                                                                                                                                                           | Pennsylvania state legislation mandating PDMP use<br>Implemented January 2017                                             | Name & number of pills prescribed after third molar extractions conducted by oral & maxillofacial surgeons (OMS) on patients across seven 6 month periods                                                                                                                                                                                                                                     | 2016 - 2019<br>Dental EHR                                                                                                                                                                                                | After mandated use, patients were much less likely to receive an opioid analgesic & the number of pills in opioid prescriptions also decreased                                                                                                                                                                                                                                                             | <ul style="list-style-type: none"> <li>Possible confounding effects from other variables</li> <li>Limitations due to data just coming from one facility</li> </ul>                                                                      |
| 49 | Watson et al., 2021     | Level II (Quasi-experimental)<br>Observational (analytic) cohort study            | Beth Israel Deaconess Medical Center Boston, MA Emergency department                                                                                                                                                                            | Massachusetts state legislation mandating PDMP<br>Implemented October 2016                                                | Monthly % of adult patients discharged from the ED with an opioid prescription                                                                                                                                                                                                                                                                                                                | 2010 - 2018<br>Facility EHR                                                                                                                                                                                              | Prior to the mandated use, ED opioid prescribing was declining. The mandate did not change the rate of decline in ED opioid prescribing but was associated with a non-sustained drop in opioid prescribing immediately following enactment                                                                                                                                                                 | <ul style="list-style-type: none"> <li>Analysis did not account for MMEs, number of days, number of pills</li> <li>Research design precludes the ability to infer a causal relationship.</li> <li>Patient outcomes not known</li> </ul> |



|    | Reference               | Research Design                                                     | Population, size, & setting | Intervention                                                                                                                                                                                                      | Outcome or Phenomenon Studied                                                                                                                                                              | Study Data                                              | Findings                                                                                                                                                                                                                                                                                   | Limitations                                                                                                                                                                                                                                                                                                                     |
|----|-------------------------|---------------------------------------------------------------------|-----------------------------|-------------------------------------------------------------------------------------------------------------------------------------------------------------------------------------------------------------------|--------------------------------------------------------------------------------------------------------------------------------------------------------------------------------------------|---------------------------------------------------------|--------------------------------------------------------------------------------------------------------------------------------------------------------------------------------------------------------------------------------------------------------------------------------------------|---------------------------------------------------------------------------------------------------------------------------------------------------------------------------------------------------------------------------------------------------------------------------------------------------------------------------------|
| 50 | Wen et al., 2017        | Level II (Quasi-experimental) Observational (analytic) cohort study | US National Medicaid        | State legislation mandating registration and/or use of PDMPs                                                                                                                                                      | Amount of drugs & spending on drugs through fee-for-service & managed care Medicaid                                                                                                        | 2011 - 2014 Medicaid State Drug Utilization Files (CMS) | <ul style="list-style-type: none"> <li>● PDMP mandates of any kind, associated with reduction in Schedule II opioids.</li> <li>● For drugs commonly used for cancer pain, there was no significant change in the number of prescriptions or of Medicaid spending on these drugs</li> </ul> | <ul style="list-style-type: none"> <li>● Analysis not done on whether prescriptions were clinically appropriate.</li> <li>● Did not have data on prescriber registration with &amp; use of PDMP</li> <li>● Analysis of patient-level measures such as daily MME &amp; risky prescriptions was not possible.</li> </ul>          |
| 51 | Wen et al., 2019        | Level II (Quasi-experimental) Observational (analytic) cohort study | US National Medicaid        | Stronger PDMP state legislation = requiring both registration & use of PDMPs in most clinical circumstances,                                                                                                      | Number of opioid prescriptions covered by Medicaid on a quarterly, per 1,000-Medicaid enrollee basis                                                                                       | 2011 - 2016 Medicaid State Drug Utilization Files (CMS) | Stronger PDMP mandates associated with lower rates of opioid prescriptions concentrated mainly in Schedule II opioids. No discernible change in the prescription rate of Schedule III-V opioids                                                                                            | <ul style="list-style-type: none"> <li>● Research design precludes the ability to infer a causal relationship.</li> <li>● Analysis of patient-level measures such as daily MME &amp; risky prescriptions was not possible. Similarly, could not contact sub analyses per diagnosis or types of controlled substances</li> </ul> |
| 52 | Winstanley et al., 2018 | Level II (Quasi-experimental) Observational (analytic) cohort study | State of Ohio               | Ohio Board of Pharmacy mailing letters to prescribers that failed to check PDMP before prescribing an opioid or benzodiazepine informing them they could be fined up to \$20,000 for non-compliance (August 2016) | <ul style="list-style-type: none"> <li>● Days' supply of opioids or benzodiazepines</li> <li>● Mean MME per opioid prescription</li> <li>● Number of multiple-provider episodes</li> </ul> | 2014 - 2017 Ohio PDMP                                   | <ul style="list-style-type: none"> <li>● Letters associated with a decrease in the mean quantities (number of pills) of opioids &amp; benzodiazepines dispensed</li> <li>● Letters also associated with reduction in multiple provider episodes</li> </ul>                                 | <ul style="list-style-type: none"> <li>● Possible confounding effect from other variables</li> <li>● Letters did not distinguish between new patients versus patients with whom clinicians had established relationships</li> <li>● Limitations due to single state included in analysis</li> </ul>                             |

|    | Reference          | Research Design                                                     | Population, size, & setting                                                                                                                                                                                                 | Intervention                                                                                                                                               | Outcome or Phenomenon Studied                                                                                                                                                                                                                                                      | Study Data                                                            | Findings                                                                                                                                                                                                                                                                                                                                                                                                                                                                       | Limitations                                                                                                                                                                                                                                                                                                                                                                                                                                                        |
|----|--------------------|---------------------------------------------------------------------|-----------------------------------------------------------------------------------------------------------------------------------------------------------------------------------------------------------------------------|------------------------------------------------------------------------------------------------------------------------------------------------------------|------------------------------------------------------------------------------------------------------------------------------------------------------------------------------------------------------------------------------------------------------------------------------------|-----------------------------------------------------------------------|--------------------------------------------------------------------------------------------------------------------------------------------------------------------------------------------------------------------------------------------------------------------------------------------------------------------------------------------------------------------------------------------------------------------------------------------------------------------------------|--------------------------------------------------------------------------------------------------------------------------------------------------------------------------------------------------------------------------------------------------------------------------------------------------------------------------------------------------------------------------------------------------------------------------------------------------------------------|
| 53 | Yarbrough, 2018    | Level II (Quasi-experimental) Observational (analytic) cohort study | Medicare MA, FL, KS, OR, AK, DE, MT, NJ, RI, SD, TX, WA, AR, GA, WI, WY<br>Control: MD, MO, NE, NH, PA                                                                                                                      | Online access to a PDMP (2011 - 2013)<br>Control states had not implemented an online PDMP by 2013                                                         | For Schedules II-IV prescriptions for Medicare Part D recipients:<br>Total days supply written for each drug for each provider in a given year                                                                                                                                     | 2010 - 2013<br>Physician-level Medicare Part D prescribing data (CMS) | <ul style="list-style-type: none"> <li>• PDMPs associated with a small decrease in opioids</li> <li>• Findings suggest some substitution toward lower schedule opioids</li> <li>• Findings suggest not requiring PDMP use largely eliminate effect of monitoring on prescribing</li> </ul>                                                                                                                                                                                     | <ul style="list-style-type: none"> <li>• Effects may be different for younger patients</li> <li>• Analysis did not include prescription dosages or prescriptions paid for in cash</li> </ul>                                                                                                                                                                                                                                                                       |
| 54 | Young et al., 2018 | Level I Experimental (randomized) parallel group                    | Individuals with multiple provider episodes in the State of Massachusetts<br><br>Control group: Comparison group closely matched on demographics & baseline prescription history whose prescribers were not in intervention | Unsolicited report of patient's 12-month controlled substance prescription history sent to each prescriber of the patients with multiple provider episodes | <ul style="list-style-type: none"> <li>• Number of Schedule II opioid prescriptions</li> <li>• Number of prescribers visited</li> <li>• Number of pharmacies used</li> <li>• Quantity, number of days, total MME, average daily MME of Schedule II opioid prescriptions</li> </ul> | 2010 - 2011<br>Massachusetts PDMP                                     | <ul style="list-style-type: none"> <li>• Intervention group had significantly greater decreases in the number of prescribers, pharmacies &amp; schedule II opioids relative to the comparison group. There were also significantly greater dosage units, total days' supply, total MME, &amp; average daily MME for the intervention group</li> <li>• However, a sub analysis of patients with an average daily dose of &gt;100 MMEs showed no significant decrease</li> </ul> | <ul style="list-style-type: none"> <li>• Analysis not done on whether prescriptions were clinically appropriate.</li> <li>• Matched comparison group based on demographics &amp; baseline prescription history, but there could have been other variables that were more influential</li> <li>• Limitations due to single state included in analysis</li> <li>• Online access to PDMP happened concurrent with unsolicited report - may be a confounder</li> </ul> |

|    | Reference            | Research Design                                                     | Population, size, & setting                                                                                                                                                              | Intervention                                                                                                                                                                                     | Outcome or Phenomenon Studied                                                                                                                                                                                                                       | Study Data                                                                                                    | Findings                                                                                                                                                                   | Limitations                                                                                                                                                                                                                                                                                                  |
|----|----------------------|---------------------------------------------------------------------|------------------------------------------------------------------------------------------------------------------------------------------------------------------------------------------|--------------------------------------------------------------------------------------------------------------------------------------------------------------------------------------------------|-----------------------------------------------------------------------------------------------------------------------------------------------------------------------------------------------------------------------------------------------------|---------------------------------------------------------------------------------------------------------------|----------------------------------------------------------------------------------------------------------------------------------------------------------------------------|--------------------------------------------------------------------------------------------------------------------------------------------------------------------------------------------------------------------------------------------------------------------------------------------------------------|
| 55 | Zeiner, et al., 2021 | Level II (Quasi-experimental) Observational (analytic) cohort study | Emergency department of Hartford Hospital, a large academic tertiary medical center (Hartford, CT)                                                                                       | State of Connecticut legislation mandating PDMP use (Oct 2015)                                                                                                                                   | Opioids prescribed upon patient discharge from ED                                                                                                                                                                                                   | Medical center EHR Jan -June 2015 compared to Jan -June 2016 Cumulative MME of solid opioids per prescription | There was a statistically significant decrease in cumulative MMEs after the legislation primarily because of less Schedule II opioid prescriptions                         | <ul style="list-style-type: none"> <li>Retrospective analysis of data from a single urban, level I trauma and tertiary care center may not be generalizable to other settings</li> <li>General awareness of the opioid crisis may have contributed to prescriber practices independent of the law</li> </ul> |
| 56 | Zhang et al., 2021   | Level II (Quasi-experimental) Observational (analytic) cohort study | AL, AZ, CA, CO, CT, ID, IL, IN, IA KY, LA, ME, MA, MI, MN, MS, NE, NV, NM, NC, ND, OH, OK, SC, TN, UT, VT, VA, WV (states with active prescriber online access to a PDMP by end of 2010) | State legislation mandating PDMP use for all prescribers in all clinical circumstances (comprehensive PDMP mandate)<br><br>As compared to “non comprehensive” mandates (all other PDMP mandates) | For patients 18 - 64 years old with diagnosis of sickle cell disease or cancer with bone metastasis <ul style="list-style-type: none"> <li>Probability of being prescribed an opioid after an ED visit</li> <li>MMEs of opioid dispensed</li> </ul> | 2011 - 2017 Health Care Cost Institute (HCCI) claims data                                                     | Comprehensive use mandates were associated with significant decreases in opioids dispensed with sickle cell disease or cancer with bone metastasis following ED encounters | Analysis not done on whether prescriptions were clinically appropriate.                                                                                                                                                                                                                                      |
