# Supplementary material
Source: MDPI journal article supplement (https://www.mdpi.com/2813-0618/2/4/30)
Supplement: s1 [file s1]

### **Appendix S3: Johns Hopkins Evidence-Based Practice Model for Nursing and Healthcare Professionals Toolkit's Research Evidence Appraisal Tool**

Dang, D., Dearholt, S., Bissett, K., Ascenzi, J., & Whalen, M. (2022). Johns Hopkins evidence-based practice for nurses and healthcare professionals: Model and guidelines. 4th ed. Sigma Theta Tau International.

For more information: <https://www.hopkinsmedicine.org/evidence-based-practice/model-tools>  
©The Johns Hopkins Hospital/The Johns Hopkins University

## Research Evidence Appraisal Tool

### Appendix E

|                                                                                                                                                                                                                                                                                                                                                                                                                                                                                                                                                                                                                                                                                                                                                                                                                                                                                                                                                                                                                                                                                                                                                                                                                                                                                                                                                                                                                                                                                                                                                                                                                                                                                                                                                                                                                                                                                                                                                                                                                                                                                                |                   |                                                                                                                             |
|------------------------------------------------------------------------------------------------------------------------------------------------------------------------------------------------------------------------------------------------------------------------------------------------------------------------------------------------------------------------------------------------------------------------------------------------------------------------------------------------------------------------------------------------------------------------------------------------------------------------------------------------------------------------------------------------------------------------------------------------------------------------------------------------------------------------------------------------------------------------------------------------------------------------------------------------------------------------------------------------------------------------------------------------------------------------------------------------------------------------------------------------------------------------------------------------------------------------------------------------------------------------------------------------------------------------------------------------------------------------------------------------------------------------------------------------------------------------------------------------------------------------------------------------------------------------------------------------------------------------------------------------------------------------------------------------------------------------------------------------------------------------------------------------------------------------------------------------------------------------------------------------------------------------------------------------------------------------------------------------------------------------------------------------------------------------------------------------|-------------------|-----------------------------------------------------------------------------------------------------------------------------|
| Does this evidence answer the EBP question?                                                                                                                                                                                                                                                                                                                                                                                                                                                                                                                                                                                                                                                                                                                                                                                                                                                                                                                                                                                                                                                                                                                                                                                                                                                                                                                                                                                                                                                                                                                                                                                                                                                                                                                                                                                                                                                                                                                                                                                                                                                    |                   | <input type="checkbox"/> Yes → Continue appraisal<br><input type="checkbox"/> No → STOP, do not continue evidence appraisal |
| <b>Article Summary Information</b>                                                                                                                                                                                                                                                                                                                                                                                                                                                                                                                                                                                                                                                                                                                                                                                                                                                                                                                                                                                                                                                                                                                                                                                                                                                                                                                                                                                                                                                                                                                                                                                                                                                                                                                                                                                                                                                                                                                                                                                                                                                             |                   |                                                                                                                             |
| Article Title:                                                                                                                                                                                                                                                                                                                                                                                                                                                                                                                                                                                                                                                                                                                                                                                                                                                                                                                                                                                                                                                                                                                                                                                                                                                                                                                                                                                                                                                                                                                                                                                                                                                                                                                                                                                                                                                                                                                                                                                                                                                                                 |                   |                                                                                                                             |
| Author(s):                                                                                                                                                                                                                                                                                                                                                                                                                                                                                                                                                                                                                                                                                                                                                                                                                                                                                                                                                                                                                                                                                                                                                                                                                                                                                                                                                                                                                                                                                                                                                                                                                                                                                                                                                                                                                                                                                                                                                                                                                                                                                     | Number:           |                                                                                                                             |
| Population, size, and setting:                                                                                                                                                                                                                                                                                                                                                                                                                                                                                                                                                                                                                                                                                                                                                                                                                                                                                                                                                                                                                                                                                                                                                                                                                                                                                                                                                                                                                                                                                                                                                                                                                                                                                                                                                                                                                                                                                                                                                                                                                                                                 | Publication date: |                                                                                                                             |
| <b>Complete after appraisal</b>                                                                                                                                                                                                                                                                                                                                                                                                                                                                                                                                                                                                                                                                                                                                                                                                                                                                                                                                                                                                                                                                                                                                                                                                                                                                                                                                                                                                                                                                                                                                                                                                                                                                                                                                                                                                                                                                                                                                                                                                                                                                |                   |                                                                                                                             |
| Evidence level and quality rating:                                                                                                                                                                                                                                                                                                                                                                                                                                                                                                                                                                                                                                                                                                                                                                                                                                                                                                                                                                                                                                                                                                                                                                                                                                                                                                                                                                                                                                                                                                                                                                                                                                                                                                                                                                                                                                                                                                                                                                                                                                                             |                   |                                                                                                                             |
| Study findings that help answer the EBP question:                                                                                                                                                                                                                                                                                                                                                                                                                                                                                                                                                                                                                                                                                                                                                                                                                                                                                                                                                                                                                                                                                                                                                                                                                                                                                                                                                                                                                                                                                                                                                                                                                                                                                                                                                                                                                                                                                                                                                                                                                                              |                   |                                                                                                                             |
| <b>Article Appraisal Workflow</b>                                                                                                                                                                                                                                                                                                                                                                                                                                                                                                                                                                                                                                                                                                                                                                                                                                                                                                                                                                                                                                                                                                                                                                                                                                                                                                                                                                                                                                                                                                                                                                                                                                                                                                                                                                                                                                                                                                                                                                                                                                                              |                   |                                                                                                                             |
| <p><b>Is this study:</b></p> <p><input type="checkbox"/> <b>QuaNtitative</b> (collection, analysis, and reporting of numerical data)<br/>                 Numerical data (how many, how much, or how often) are used to formulate facts, uncover patterns, and generalize to a larger population; provides observed effects of a program, problem, or condition. Common methods are polls, surveys, observations, and reviews of records or documents. Data are analyzed using statistical tests.<br/>                 ➔ <b>Go to Section I for QuaNtitative leveling</b></p> <p><input type="checkbox"/> <b>QuaLitative</b> (collection, analysis, and reporting of narrative data)<br/>                 Rich narrative data to gain a deep understanding of phenomena, meanings, perceptions, concepts, and experiences from those experiencing it. Sample sizes are relatively small and determined by the point of redundancy when no new information is gleaned, and key themes are reiterated (data saturation). Data are analyzed using thematic analysis. Often a starting point for studies when little research exists; may use results to design empirical studies. Common methods are focus groups, individual interviews (unstructured or semi-structured), and participation/observations.<br/>                 ➔ <b>Go to Section II for QuaLitative leveling</b></p> <p><input type="checkbox"/> <b>Mixed methods</b> (results reported both numerically and narratively)<br/>                 A study design (a single study or series of studies) that uses rigorous procedures in collecting and analyzing both quaNtitative and quaLitative data. <i>Note:</i> QuaNtitative survey designs with open-ended questions do not meet criteria for mixed methods research because those questions are not approached using strict quaLitative methods. Mixed methods studies provide a better understanding of research problems than using either a quaNtitative or quaLitative approach alone.<br/>                 ➔ <b>Go to Section III for Mixed Methods leveling</b></p> |                   |                                                                                                                             |

# Research Evidence Appraisal Tool

## Appendix E

### Section I: QuaNtitative Appraisal

**A**

Is this a report of a single research study?

☐ Yes → Continue to decision tree

☐ No → Go to Section I: B

Level

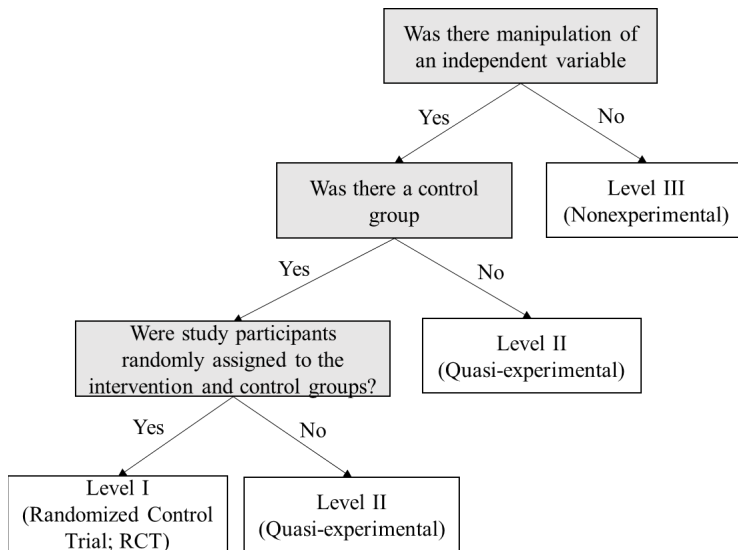

Level I studies include randomized control trials (RCTs) or experimental studies

Level II studies have some degree of investigator control and some manipulation of an independent variable but lack random assignment to groups and may not have a control group

Level III studies lack manipulation of an independent variable; can be descriptive, comparative, or correlational; and often use secondary data

Quality

After determining the level of evidence, determine the quality of evidence using the considerations below:

|                                                                                                                                                                                                                                                                                                                                     |                                                                                              |                                                                                           |                                                                                              |
|-------------------------------------------------------------------------------------------------------------------------------------------------------------------------------------------------------------------------------------------------------------------------------------------------------------------------------------|----------------------------------------------------------------------------------------------|-------------------------------------------------------------------------------------------|----------------------------------------------------------------------------------------------|
| Does the researcher identify what is known and not known about the problem?                                                                                                                                                                                                                                                         | <input type="checkbox"/> Yes                                                                 | <input type="checkbox"/> No                                                               |                                                                                              |
| Does the researcher identify how the study will address any gaps in knowledge?                                                                                                                                                                                                                                                      | <input type="checkbox"/> Yes                                                                 | <input type="checkbox"/> No                                                               |                                                                                              |
| Was the purpose of the study clearly presented?                                                                                                                                                                                                                                                                                     | <input type="checkbox"/> Yes                                                                 | <input type="checkbox"/> No                                                               |                                                                                              |
| Was the literature review current (most sources within the past five years or a seminal study)?                                                                                                                                                                                                                                     | <input type="checkbox"/> Yes                                                                 | <input type="checkbox"/> No                                                               |                                                                                              |
| Was sample size sufficient based on study design and rationale?                                                                                                                                                                                                                                                                     | <input type="checkbox"/> Yes                                                                 | <input type="checkbox"/> No                                                               |                                                                                              |
| If there is a control group: <ul style="list-style-type: none"> <li>Were the characteristics and/or demographics similar in both the control and intervention groups?</li> <li>If multiple settings were used, were the settings similar?</li> <li>Were all groups equally treated except for the intervention group(s)?</li> </ul> | <input type="checkbox"/> Yes<br><input type="checkbox"/> Yes<br><input type="checkbox"/> Yes | <input type="checkbox"/> No<br><input type="checkbox"/> No<br><input type="checkbox"/> No | <input type="checkbox"/> N/A<br><input type="checkbox"/> N/A<br><input type="checkbox"/> N/A |
| Are data collection methods described clearly?                                                                                                                                                                                                                                                                                      | <input type="checkbox"/> Yes                                                                 | <input type="checkbox"/> No                                                               |                                                                                              |
| Were the instruments reliable (Cronbach's $\alpha$ [alpha] $\geq 0.70$ )?                                                                                                                                                                                                                                                           | <input type="checkbox"/> Yes                                                                 | <input type="checkbox"/> No                                                               | <input type="checkbox"/> N/A                                                                 |
| Was instrument validity discussed?                                                                                                                                                                                                                                                                                                  | <input type="checkbox"/> Yes                                                                 | <input type="checkbox"/> No                                                               | <input type="checkbox"/> N/A                                                                 |
| If surveys or questionnaires were used, was the response rate $\geq 25\%$ ?                                                                                                                                                                                                                                                         | <input type="checkbox"/> Yes                                                                 | <input type="checkbox"/> No                                                               | <input type="checkbox"/> N/A                                                                 |
| Were the results presented clearly?                                                                                                                                                                                                                                                                                                 | <input type="checkbox"/> Yes                                                                 | <input type="checkbox"/> No                                                               |                                                                                              |
| If tables were presented, was the narrative consistent with the table content?                                                                                                                                                                                                                                                      | <input type="checkbox"/> Yes                                                                 | <input type="checkbox"/> No                                                               | <input type="checkbox"/> N/A                                                                 |
| Were study limitations identified and addressed?                                                                                                                                                                                                                                                                                    | <input type="checkbox"/> Yes                                                                 | <input type="checkbox"/> No                                                               |                                                                                              |
| Were conclusions based on results?                                                                                                                                                                                                                                                                                                  | <input type="checkbox"/> Yes                                                                 | <input type="checkbox"/> No                                                               |                                                                                              |

Research Evidence Appraisal Tool  
Appendix E

## Section I: QuaNtitative Appraisal (continued)

Circle the appropriate quality rating below:

Quality

**A High quality:** Consistent, generalizable results; sufficient sample size for the study design; adequate control; definitive conclusions; consistent recommendations based on comprehensive literature review that includes thorough reference to scientific evidence.

**B Good quality:** Reasonably consistent results; sufficient sample size for the study design; some control; fairly definitive conclusions; reasonably consistent recommendations based on fairly comprehensive literature review that includes some reference to scientific evidence.

**C Low quality:** Little evidence with inconsistent results; insufficient sample size for the study design; conclusions cannot be drawn.

Record findings that help answer the EBP question on page 1

Research Evidence Appraisal Tool  
Appendix E

Section I: QuaNtitative Appraisal (continued)

**B** Is this a summary of multiple sources of research evidence? ☐ Yes → Continue to decision tree  
☐ No → Use the Nonresearch Evidence Appraisal tool (Appendix F)

|                                                                                                 |                                                                                                                                                                                                                                                                                                                                                                                                                                                                                                                                                                                                         |                                                                                              |                                                                                           |
|-------------------------------------------------------------------------------------------------|---------------------------------------------------------------------------------------------------------------------------------------------------------------------------------------------------------------------------------------------------------------------------------------------------------------------------------------------------------------------------------------------------------------------------------------------------------------------------------------------------------------------------------------------------------------------------------------------------------|----------------------------------------------------------------------------------------------|-------------------------------------------------------------------------------------------|
| Level                                                                                           | <pre> graph TD     A[Was there a comprehensive search strategy and rigorous appraisal method?] -- Yes --&gt; B[Do the studies only include research evidence (Levels I, II or III)]     A -- No --&gt; C[Go to the Nonresearch Evidence Appraisal Tool (Appendix F)]     B -- Yes --&gt; D[Are all studies included RCTs?]     B -- No --&gt; C     D -- Yes --&gt; E[Level I]     D -- No --&gt; F[Do the studies include non-experimental research in addition to RCTs and/or quasi-experimental studies?]     F -- Yes --&gt; G[Level III]     F -- No --&gt; H[Level II]                     </pre> |                                                                                              |                                                                                           |
|                                                                                                 | <p>After determining level of evidence, determine the quality of evidence using the considerations below:</p>                                                                                                                                                                                                                                                                                                                                                                                                                                                                                           |                                                                                              |                                                                                           |
| Quality                                                                                         | Were the variables of interest clearly identified?                                                                                                                                                                                                                                                                                                                                                                                                                                                                                                                                                      | <input type="checkbox"/> Yes                                                                 | <input type="checkbox"/> No                                                               |
|                                                                                                 | Was the search comprehensive and reproducible?                                                                                                                                                                                                                                                                                                                                                                                                                                                                                                                                                          | <input type="checkbox"/> Yes                                                                 | <input type="checkbox"/> No                                                               |
|                                                                                                 | <ul style="list-style-type: none"> <li>Key terms stated</li> <li>Multiple databases searched and identified</li> <li>Inclusion and exclusion criteria stated</li> </ul>                                                                                                                                                                                                                                                                                                                                                                                                                                 | <input type="checkbox"/> Yes<br><input type="checkbox"/> Yes<br><input type="checkbox"/> Yes | <input type="checkbox"/> No<br><input type="checkbox"/> No<br><input type="checkbox"/> No |
|                                                                                                 | Was there a flow diagram that included the number of studies eliminated at each level of review?                                                                                                                                                                                                                                                                                                                                                                                                                                                                                                        | <input type="checkbox"/> Yes                                                                 | <input type="checkbox"/> No                                                               |
|                                                                                                 | Were details of included studies presented (design, sample, methods, results, outcomes, strengths, and limitations)?                                                                                                                                                                                                                                                                                                                                                                                                                                                                                    | <input type="checkbox"/> Yes                                                                 | <input type="checkbox"/> No                                                               |
|                                                                                                 | Were methods for appraising the strength of evidence (level and quality) described?                                                                                                                                                                                                                                                                                                                                                                                                                                                                                                                     | <input type="checkbox"/> Yes                                                                 | <input type="checkbox"/> No                                                               |
|                                                                                                 | Were conclusions based on results? <ul style="list-style-type: none"> <li>Results were interpreted</li> <li>Conclusions flowed logically from the research question, results, and interpretation</li> </ul>                                                                                                                                                                                                                                                                                                                                                                                             | <input type="checkbox"/> Yes<br><input type="checkbox"/> Yes                                 | <input type="checkbox"/> No<br><input type="checkbox"/> No                                |
| Did the systematic review include a section addressing limitations and how they were addressed? | <input type="checkbox"/> Yes                                                                                                                                                                                                                                                                                                                                                                                                                                                                                                                                                                            | <input type="checkbox"/> No                                                                  |                                                                                           |

Research Evidence Appraisal Tool  
Appendix E

| Section I: QuaNtitative Appraisal (continued)               |                                                                                                                                                                                                                                                                                                                                                                         |
|-------------------------------------------------------------|-------------------------------------------------------------------------------------------------------------------------------------------------------------------------------------------------------------------------------------------------------------------------------------------------------------------------------------------------------------------------|
|                                                             | Circle the appropriate quality rating below:                                                                                                                                                                                                                                                                                                                            |
| Quality                                                     | <p><b>A High quality:</b> Consistent, generalizable results; sufficient sample size for the study design; adequate control; definitive conclusions; recommendations consistent with the study's findings and include thorough reference to scientific evidence</p>                                                                                                      |
|                                                             | <p><b>B Good quality:</b> Reasonably consistent results; sufficient sample size for the study design; some control; fairly definitive conclusions; recommendations reasonably consistent recommendations based on with the study's findings and fairly comprehensive evidence appraisal (vs literature review?) that includes some reference to scientific evidence</p> |
|                                                             | <p><b>C Low quality:</b> Little evidence with inconsistent results; insufficient sample size for the study design; conclusions cannot be drawn.</p>                                                                                                                                                                                                                     |
| Record findings that help answer the EBP question on page 1 |                                                                                                                                                                                                                                                                                                                                                                         |

# Research Evidence Appraisal Tool

## Appendix E

### Section II: QuaLitative Appraisal

**A**

Is this a report of a single research study?

☐ Yes → This is Level III evidence

☐ No → Go to Section II: B

|         |                                                                                                                                                                                                                                             |                              |                             |
|---------|---------------------------------------------------------------------------------------------------------------------------------------------------------------------------------------------------------------------------------------------|------------------------------|-----------------------------|
| Quality | After determining level of evidence, determine the quality of evidence using the considerations below:                                                                                                                                      |                              |                             |
|         | Was there a clearly identifiable and articulated:                                                                                                                                                                                           |                              |                             |
|         | • Purpose?                                                                                                                                                                                                                                  | <input type="checkbox"/> Yes | <input type="checkbox"/> No |
|         | • Research question?                                                                                                                                                                                                                        | <input type="checkbox"/> Yes | <input type="checkbox"/> No |
|         | • Justification for design and/or theoretical framework used?                                                                                                                                                                               | <input type="checkbox"/> Yes | <input type="checkbox"/> No |
|         | Do participants have knowledge of the subject the researchers are trying to explore?                                                                                                                                                        | <input type="checkbox"/> Yes | <input type="checkbox"/> No |
|         | Were characteristics of study participants described?                                                                                                                                                                                       | <input type="checkbox"/> Yes | <input type="checkbox"/> No |
|         | Was a verification process used in every step of data analysis (e.g., triangulation, response validation, independent double check, member checking)? (Credibility)                                                                         | <input type="checkbox"/> Yes | <input type="checkbox"/> No |
|         | Does the researcher provide sufficient documentation of their thinking, decisions, and methods related to the study allowing the reader to follow their decision-making (e.g., how themes and categories were formulated)? (Confirmability) | <input type="checkbox"/> Yes | <input type="checkbox"/> No |
|         | Does the researcher provide an accurate and rich description of findings by providing the information necessary to evaluate the analysis of data? (Fittingness)                                                                             | <input type="checkbox"/> Yes | <input type="checkbox"/> No |
|         | Does the researcher acknowledge and/or address their own role and potential influence during data collection?                                                                                                                               | <input type="checkbox"/> Yes | <input type="checkbox"/> No |
|         | Was sampling adequate, as evidenced by achieving data saturation?                                                                                                                                                                           | <input type="checkbox"/> Yes | <input type="checkbox"/> No |
|         | Does the researcher provide illustrations from the data?                                                                                                                                                                                    | <input type="checkbox"/> Yes | <input type="checkbox"/> No |
|         | • If yes, do the provided illustrations support conclusions?                                                                                                                                                                                | <input type="checkbox"/> Yes | <input type="checkbox"/> No |
|         | Is there congruency between the findings and the data?                                                                                                                                                                                      | <input type="checkbox"/> Yes | <input type="checkbox"/> No |
|         | Is there congruency between the research methodology and:                                                                                                                                                                                   |                              |                             |
|         | • The research question(s)                                                                                                                                                                                                                  | <input type="checkbox"/> Yes | <input type="checkbox"/> No |
|         | • The methods to collect data                                                                                                                                                                                                               | <input type="checkbox"/> Yes | <input type="checkbox"/> No |
|         | • The interpretation of results                                                                                                                                                                                                             | <input type="checkbox"/> Yes | <input type="checkbox"/> No |
|         | Are discussion and conclusions congruent with the purpose and objectives, and supported by literature?                                                                                                                                      | <input type="checkbox"/> Yes | <input type="checkbox"/> No |
|         | Are conclusions drawn based on the data collected (e.g., the product of the observations or interviews)?                                                                                                                                    | <input type="checkbox"/> Yes | <input type="checkbox"/> No |

Research Evidence Appraisal Tool  
Appendix E

## Section II: Qualitative Appraisal (continued)

|                                                             |                                                                                                                                                                                                                                                                                                                                                                                                                                                                                                                                                                                                                                                                                                                                                                                                                                                                                                                                                                                                                                                                                                                                                                                                                                                                                                                                                                                                                                                                                                                                                                                    |
|-------------------------------------------------------------|------------------------------------------------------------------------------------------------------------------------------------------------------------------------------------------------------------------------------------------------------------------------------------------------------------------------------------------------------------------------------------------------------------------------------------------------------------------------------------------------------------------------------------------------------------------------------------------------------------------------------------------------------------------------------------------------------------------------------------------------------------------------------------------------------------------------------------------------------------------------------------------------------------------------------------------------------------------------------------------------------------------------------------------------------------------------------------------------------------------------------------------------------------------------------------------------------------------------------------------------------------------------------------------------------------------------------------------------------------------------------------------------------------------------------------------------------------------------------------------------------------------------------------------------------------------------------------|
| Quality                                                     | Circle the appropriate quality rating below:                                                                                                                                                                                                                                                                                                                                                                                                                                                                                                                                                                                                                                                                                                                                                                                                                                                                                                                                                                                                                                                                                                                                                                                                                                                                                                                                                                                                                                                                                                                                       |
|                                                             | <p><b>A/B High/Good Quality:</b> The report discusses efforts to enhance or evaluate the quality of the data and the overall inquiry in sufficient detail; it describes the specific techniques used to enhance the quality of the inquiry.</p> <p>Evidence of at least half or all the following is found in the report:</p> <ul style="list-style-type: none"> <li>• <i>Transparency:</i> Describes how information was documented to justify decisions, how data were reviewed by others, and how themes and categories were formulated.</li> <li>• <i>Diligence:</i> Reads and rereads data to check interpretations; seeks opportunity to find multiple sources to corroborate evidence.</li> <li>• <i>Verification:</i> The process of checking, confirming, and ensuring methodologic coherence.</li> <li>• <i>Self-reflection and self-scrutiny:</i> Being continuously aware of how a researcher's experiences, background, or prejudices might shape and bias analysis and interpretations.</li> <li>• <i>Participant-driven inquiry:</i> Participants shape the scope and breadth of questions; analysis and interpretation give voice to those who participated.</li> <li>• <i>Insightful interpretation:</i> Data and knowledge are linked in meaningful ways to relevant literature.</li> </ul> <p><b>C Low quality:</b> Lack of clarity and coherence of reporting, lack of transparency in reporting methods; poor interpretation of data and offers little insight into the phenomena of interest; few, if any, of the features listed for high/good quality.</p> |
| Record findings that help answer the EBP question on page 1 |                                                                                                                                                                                                                                                                                                                                                                                                                                                                                                                                                                                                                                                                                                                                                                                                                                                                                                                                                                                                                                                                                                                                                                                                                                                                                                                                                                                                                                                                                                                                                                                    |



# Research Evidence Appraisal Tool

## Appendix E

### Section II: Qualitative Appraisal

**B**

Is this a summary of multiple sources of qualitative research evidence with a comprehensive search strategy and rigorous appraisal method (Meta-synthesis)?

☐ Yes → This is Level III evidence

☐ No → Use the Nonresearch Evidence Appraisal tool (Appendix F)

After determining level of evidence, determine the quality of evidence using the considerations below:

|                                                                                                                 |                              |                             |
|-----------------------------------------------------------------------------------------------------------------|------------------------------|-----------------------------|
| Were the search strategy and criteria for selecting primary studies clearly defined?                            | <input type="checkbox"/> Yes | <input type="checkbox"/> No |
| Was there a description of a systematic and thorough process for how data were analyzed?                        | <input type="checkbox"/> Yes | <input type="checkbox"/> No |
| • Were methods described for comparing findings from each study?                                                | <input type="checkbox"/> Yes | <input type="checkbox"/> No |
| • Were methods described for interpreting data?                                                                 | <input type="checkbox"/> Yes | <input type="checkbox"/> No |
| • Was sufficient data presented to support the interpretations?                                                 | <input type="checkbox"/> Yes | <input type="checkbox"/> No |
| Did synthesis reflect:                                                                                          |                              |                             |
| • New insights?                                                                                                 | <input type="checkbox"/> Yes | <input type="checkbox"/> No |
| • Discovery of essential features of the phenomena?                                                             | <input type="checkbox"/> Yes | <input type="checkbox"/> No |
| • A fuller understanding of the phenomena?                                                                      | <input type="checkbox"/> Yes | <input type="checkbox"/> No |
| Are findings clearly linked to and match the data?                                                              | <input type="checkbox"/> Yes | <input type="checkbox"/> No |
| Are findings connected to the purpose, data collection, and analysis?                                           | <input type="checkbox"/> Yes | <input type="checkbox"/> No |
| Are discussion and conclusions connected to the purpose, objectives, and (if possible) supported by literature? | <input type="checkbox"/> Yes | <input type="checkbox"/> No |
| Did authors describe clearly how they arrived at the interpretation of the findings?                            | <input type="checkbox"/> Yes | <input type="checkbox"/> No |

Quality

Circle the appropriate quality rating below:

**A/B High/Good Quality:** The report discusses efforts to enhance or evaluate the quality of the data and the overall inquiry in sufficient detail; and it describes the specific techniques used to enhance the quality of the inquiry. Evidence of some or all of the following is found in the report:

- *Transparency:* Describes how information was documented to justify decisions, how data were reviewed by others, and how themes and categories were formulated.
- *Diligence:* Reads and rereads data to check interpretations; seeks opportunity to find multiple sources to corroborate evidence.
- *Verification:* The process of checking, confirming, and ensuring methodologic coherence.
- *Self-reflection and self-scrutiny:* Being continuously aware of how a researcher's experiences, background, or prejudices might shape and bias analysis and interpretations.
- *Participant-driven inquiry:* Participants shape the scope and breadth of questions; analysis and interpretation give voice to those who participated.
- *Insightful interpretation:* Data and knowledge are linked in meaningful ways to relevant literature.

**C Low quality:** Lack of clarity and coherence of reporting, lack of transparency in reporting methods; poor interpretation of data and offers little insight into the phenomena of interest; few, if any of the features listed for high/good quality.

Record findings that help answer the EBP question on page 1

## Research Evidence Appraisal Tool

### Section III: Mixed Methods Appraisal

You will need to appraise both parts of the study independently before appraising the study as a whole. Evaluate the quantitative part of the study using Section I. Evaluate the qualitative part of the study using Section II, then return here to complete appraisal.

|                                                             |                                                                                                                                                                                                                                                                                                                                                                                                                                                                                                                                                                                                                                                                                                                                   |                              |                             |
|-------------------------------------------------------------|-----------------------------------------------------------------------------------------------------------------------------------------------------------------------------------------------------------------------------------------------------------------------------------------------------------------------------------------------------------------------------------------------------------------------------------------------------------------------------------------------------------------------------------------------------------------------------------------------------------------------------------------------------------------------------------------------------------------------------------|------------------------------|-----------------------------|
|                                                             |                                                                                                                                                                                                                                                                                                                                                                                                                                                                                                                                                                                                                                                                                                                                   | Level                        | Quality                     |
| Level                                                       | Quantitative Portion                                                                                                                                                                                                                                                                                                                                                                                                                                                                                                                                                                                                                                                                                                              |                              |                             |
|                                                             | Qualitative Portion                                                                                                                                                                                                                                                                                                                                                                                                                                                                                                                                                                                                                                                                                                               |                              |                             |
|                                                             | <p>The level of mixed methods evidence is based on the sequence of data collection. Quantitative data collection followed by qualitative (explanatory design) is based on the level of the quantitative portion. All other designs (exploratory, convergent, or multiphase) are Level III evidence.</p> <p>Explanatory sequential designs collected quantitative data first, followed by qualitative.<br/>         Exploratory sequential designs collect qualitative data first, followed by quantitative.<br/>         Convergent parallel designs collect quantitative and qualitative data at the same time.<br/>         Multiphase designs collect qualitative and quantitative data over more than one phase.</p>          |                              |                             |
|                                                             |                                                                                                                                                                                                                                                                                                                                                                                                                                                                                                                                                                                                                                                                                                                                   |                              |                             |
| Quality                                                     | After determining the level of evidence, determine the quality of evidence using the considerations below:                                                                                                                                                                                                                                                                                                                                                                                                                                                                                                                                                                                                                        |                              |                             |
|                                                             | Was the mixed-methods research design relevant to address both quantitative and qualitative research questions (or objectives)?                                                                                                                                                                                                                                                                                                                                                                                                                                                                                                                                                                                                   | <input type="checkbox"/> Yes | <input type="checkbox"/> No |
|                                                             | Was the research design relevant to address the quantitative and the qualitative aspects of the mixed-methods question (or objective)?                                                                                                                                                                                                                                                                                                                                                                                                                                                                                                                                                                                            | <input type="checkbox"/> Yes | <input type="checkbox"/> No |
|                                                             | Circle the appropriate quality rating below:                                                                                                                                                                                                                                                                                                                                                                                                                                                                                                                                                                                                                                                                                      |                              |                             |
|                                                             | <p><b>A High quality:</b> Contains high-quality quantitative and qualitative study components; highly relevant study design; relevant integration of data or results; and careful consideration of the limitations of the chosen approach.</p> <p><b>B Good quality:</b> Contains good-quality quantitative and qualitative study components; relevant study design; moderately relevant integration of data or results; and some discussion of limitations of integration.</p> <p><b>C Low quality:</b> Contains low quality quantitative and qualitative study components; study design not relevant to research questions or objectives; poorly integrated data or results; and no consideration of limits of integration.</p> |                              |                             |
| Record findings that help answer the EBP question on page 1 |                                                                                                                                                                                                                                                                                                                                                                                                                                                                                                                                                                                                                                                                                                                                   |                              |                             |
