# Supplementary material
Source: MDPI journal article supplement (https://www.mdpi.com/2813-0618/2/4/30)
Supplement: s1 [file s1]

Archive with 8 entries (8 files):
- Figure S1_YearsOfData.drawio.png
- Figure S2_USMap.png
- Figure S3.drawio.png
- Figure S4_StudyScope.drawio.png
- Supplementary Material 1.pdf
- Supplementary Material 2.pdf
- Supplementary Material 3.pdf
- Table S1_SummaryResults.pdf
