# Supplementary material
Source: MDPI journal article supplement (https://www.mdpi.com/2813-0618/2/4/30)

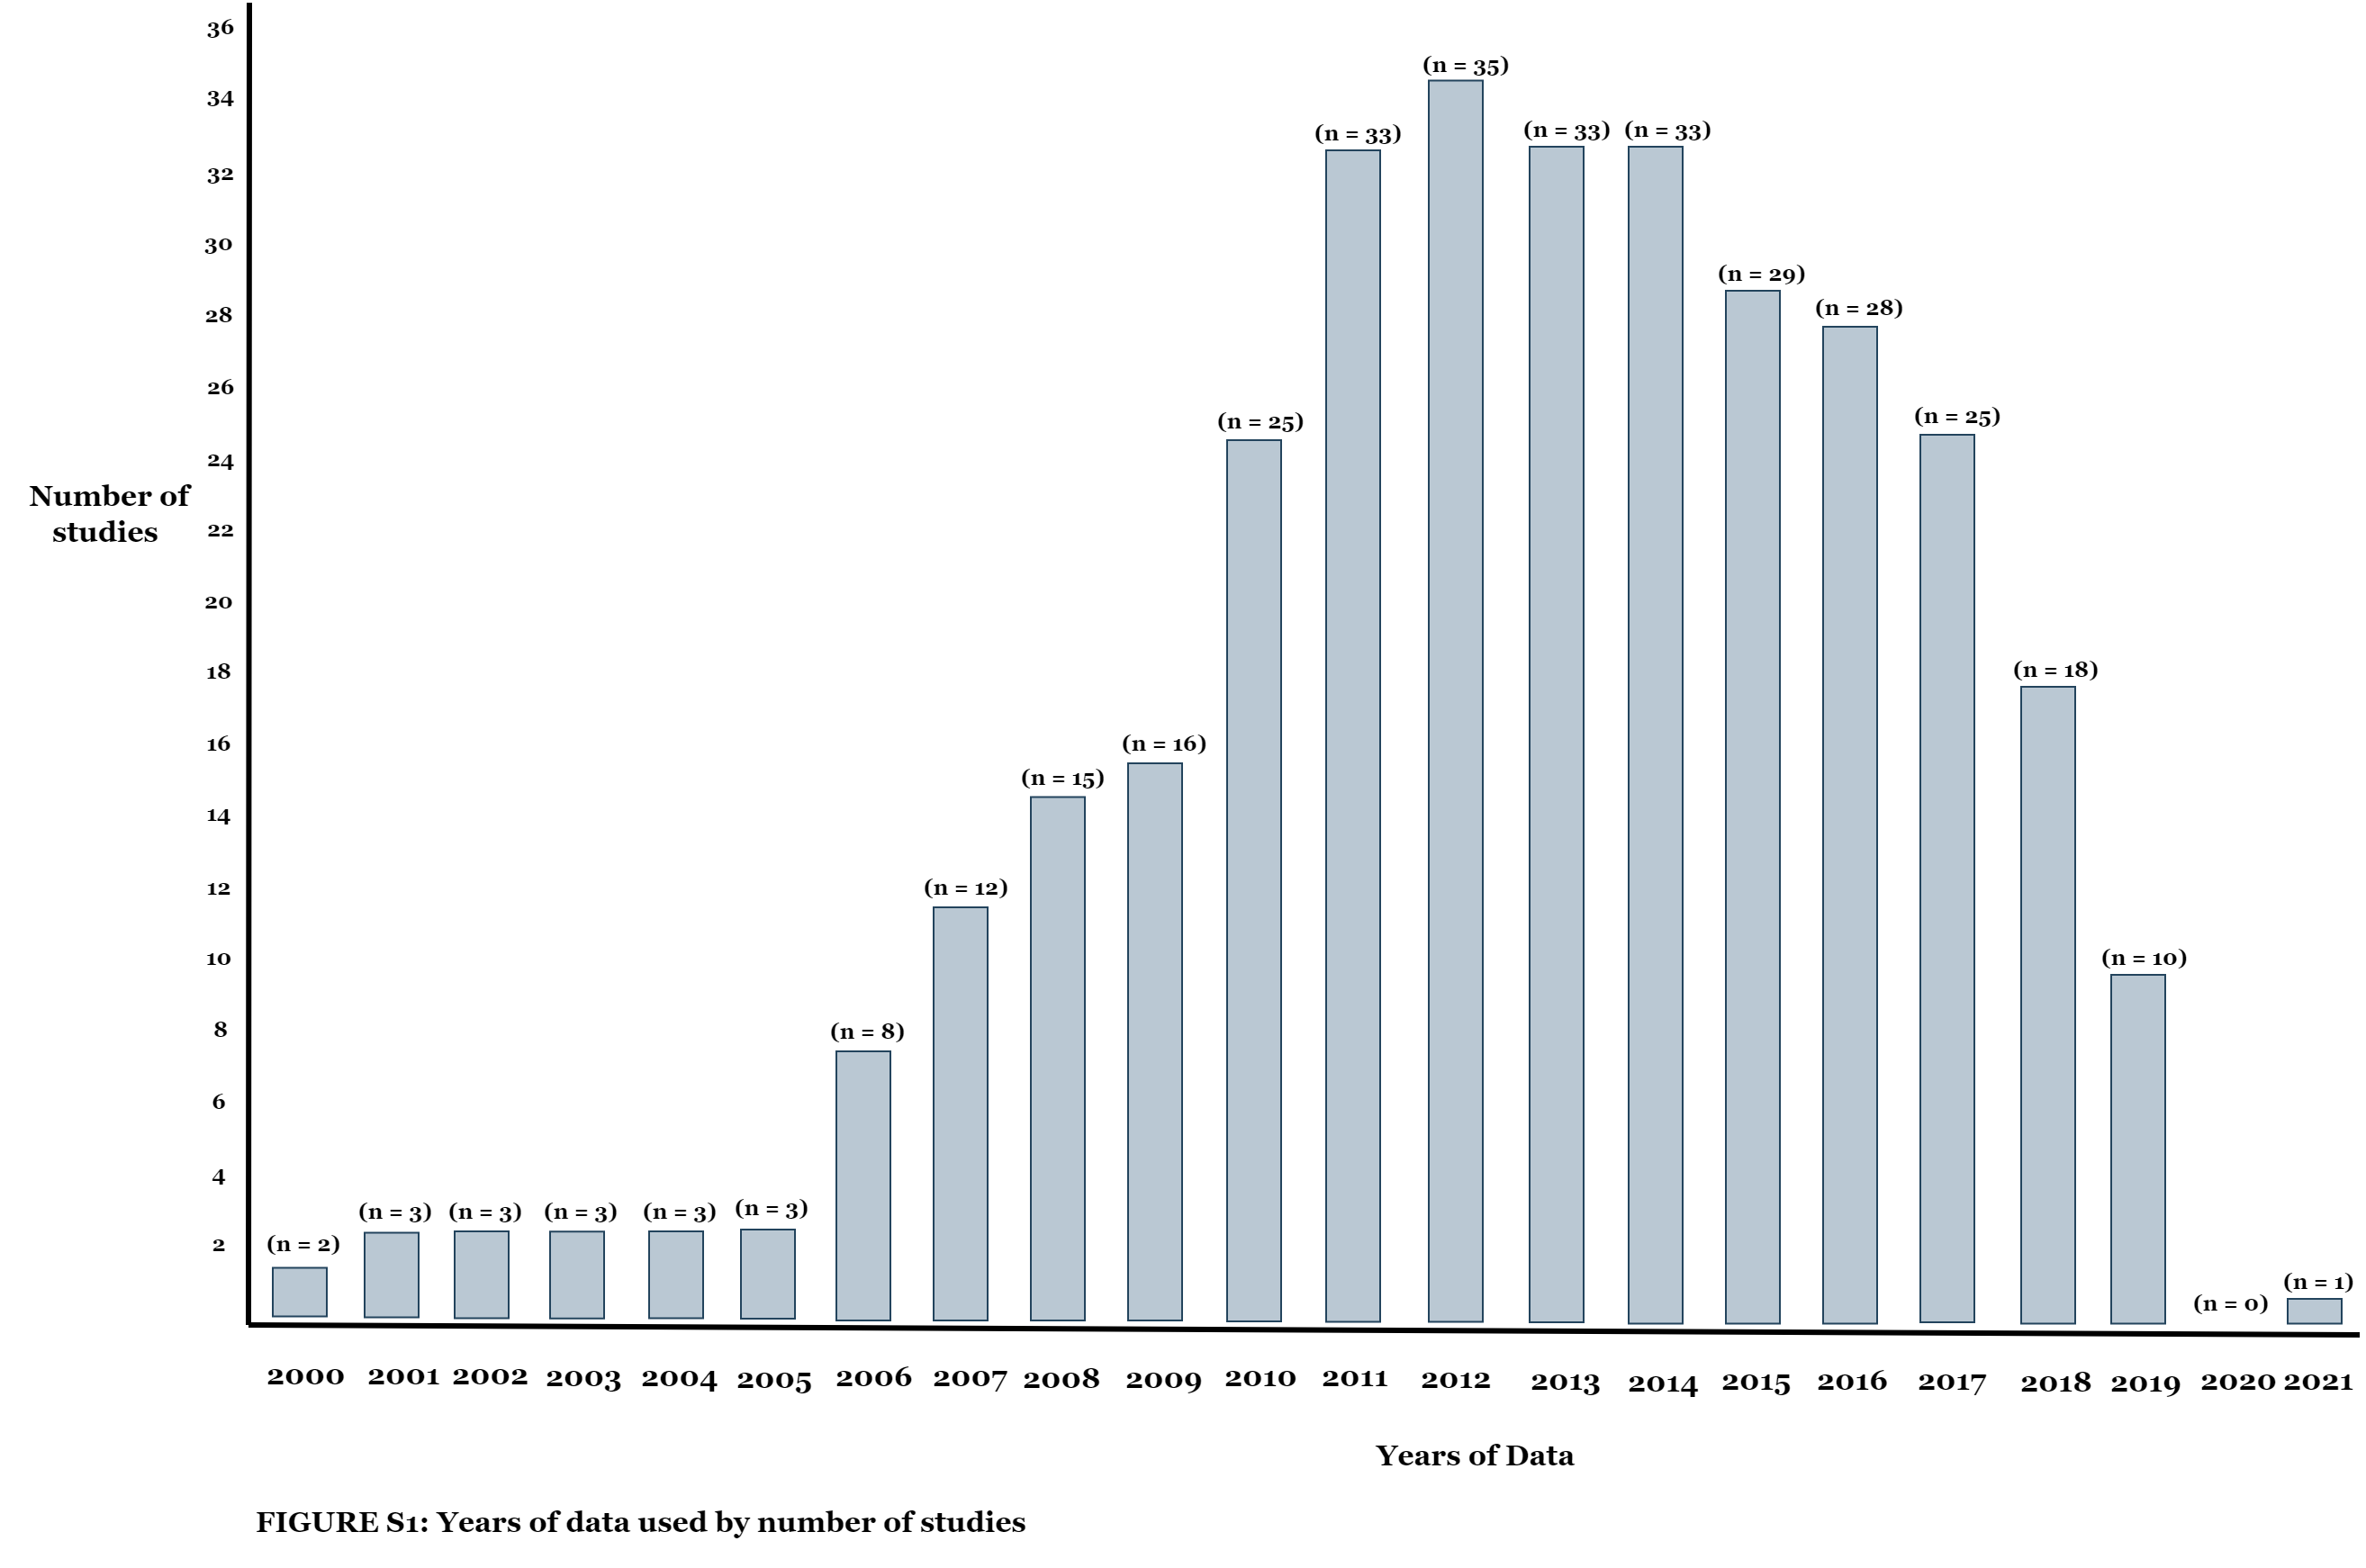

Supplement: s1 [file s1 › Figure S1_YearsOfData.drawio.png]

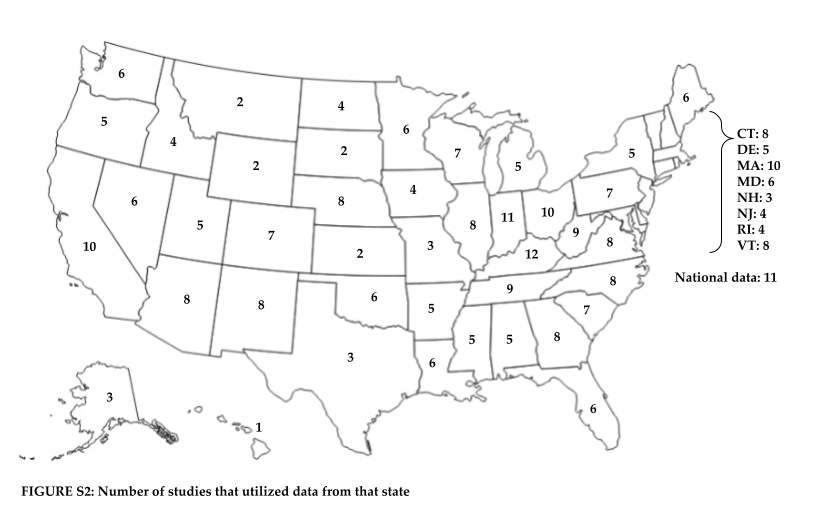

Supplement: s1 [file s1 › Figure S2_USMap.png]

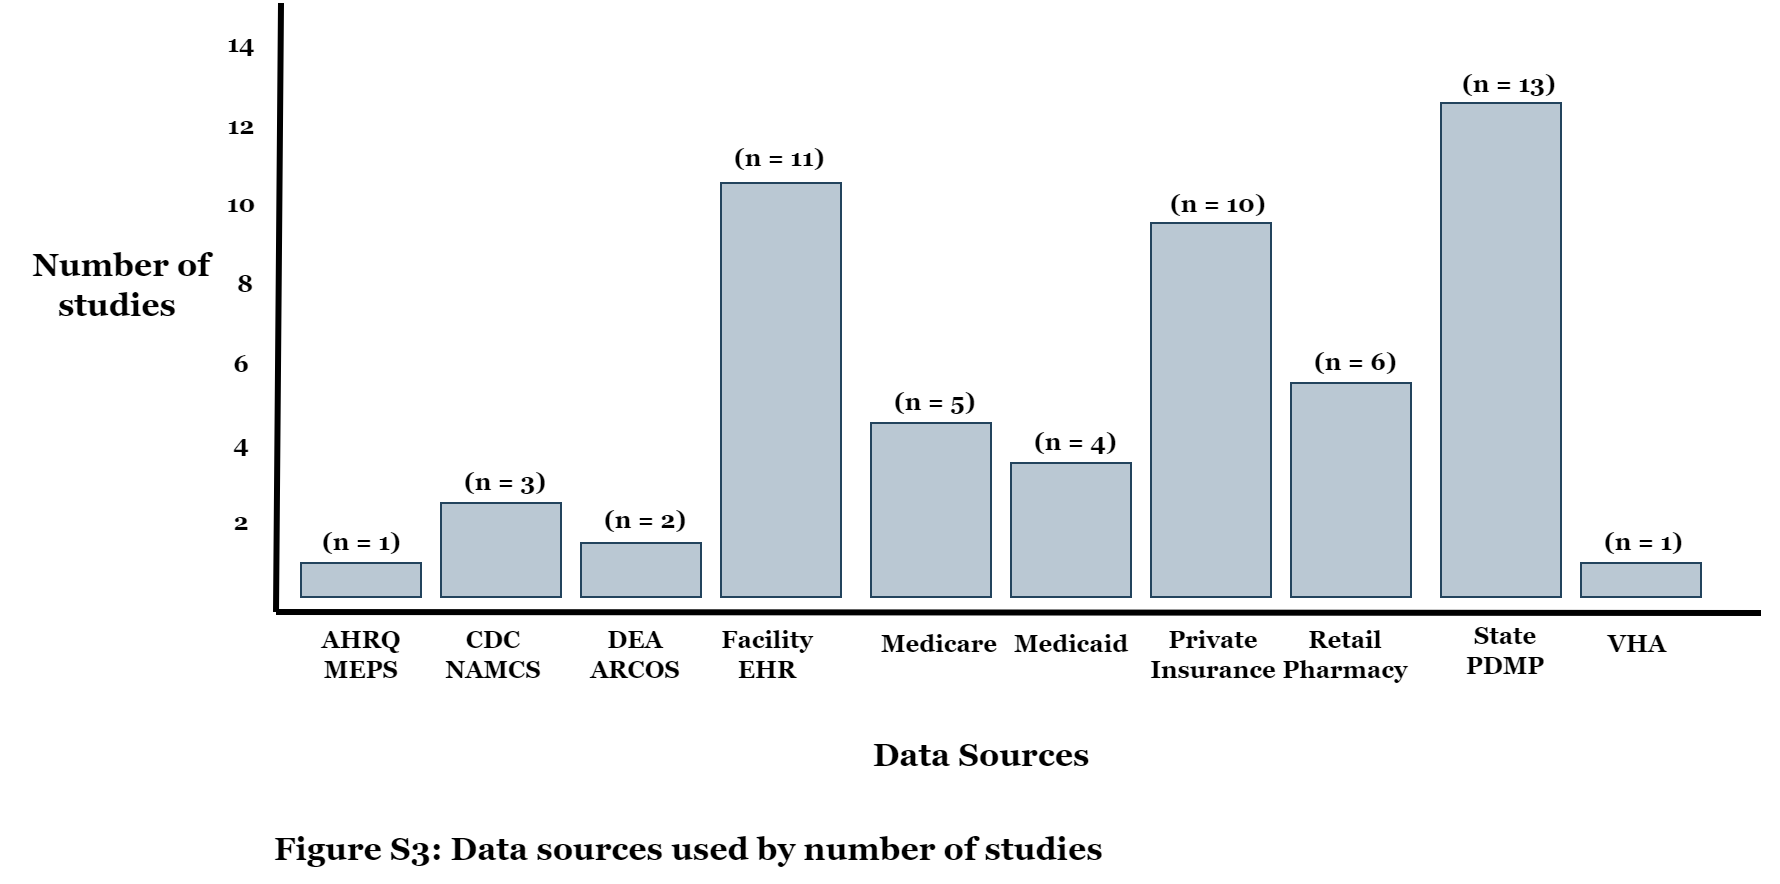

Supplement: s1 [file s1 › Figure S3.drawio.png]

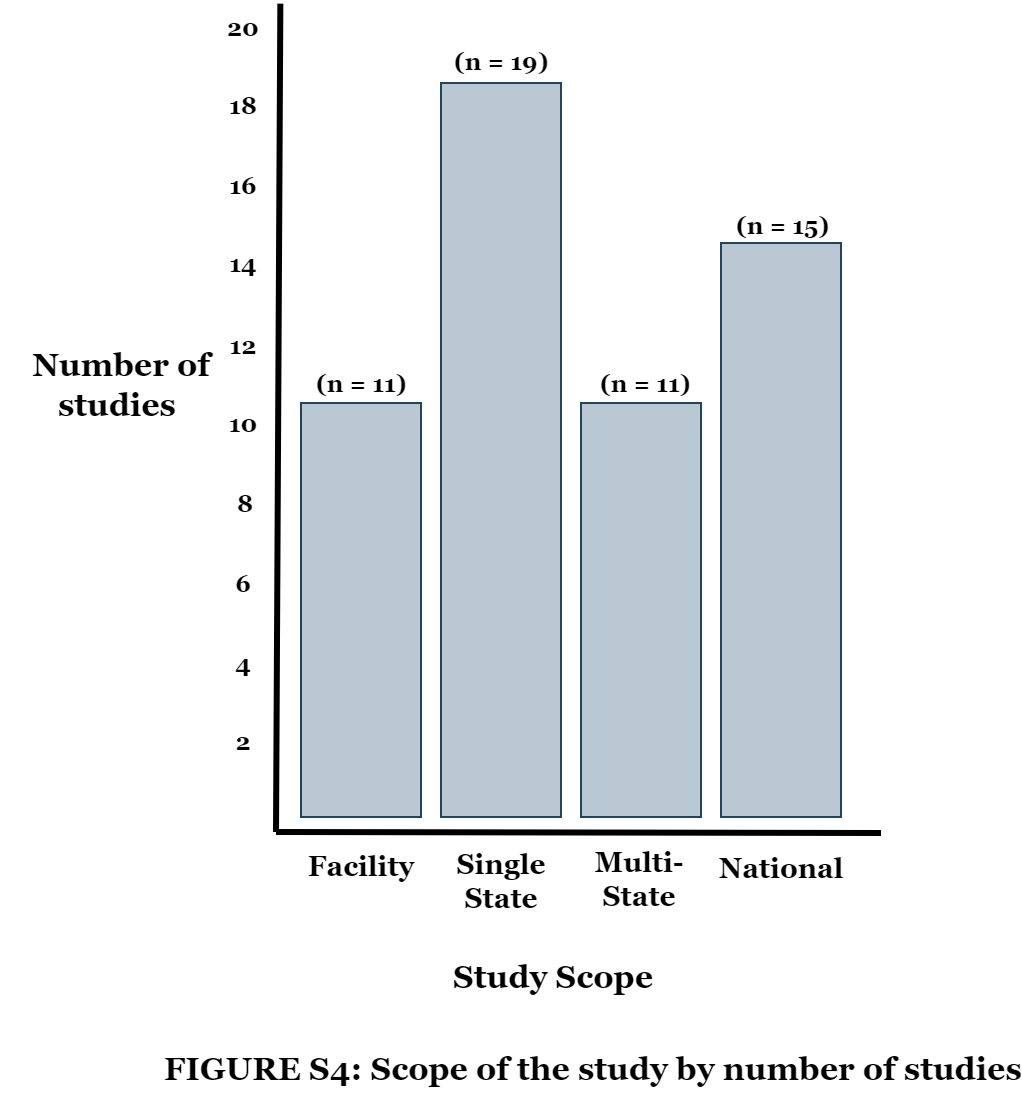

Supplement: s1 [file s1 › Figure S4_StudyScope.drawio.png]
